# Supplementary material for: Luminescent pentafluorophenyl-cycloplatinated complexes: synthesis, characterization, photophysics, cytotoxicity and cellular imaging
Source: Royal Society of Chemistry journal article supplement (doi:10.1039/c5dt02721g), 2015-01-01
Supplement: c5dt02721g1.pdf [file c5dt02721g1.pdf]

## Supplementary Information for

### Luminescent pentafluorophenyl-cycloplatinated complexes: synthesis, characterization, photophysics, cytotoxicity and cellular imaging

J. R. Berenguer,<sup>a</sup> J. G. Pichel,<sup>\*b</sup> N. Giménez,<sup>a</sup> E. Lalinde,<sup>a</sup> M. T. Moreno,<sup>\*a</sup> S. Piñeiro-Hermida.<sup>b</sup>

<sup>a</sup> *Departamento de Química-Centro de Síntesis Química de La Rioja, (CISQ), Universidad de La Rioja, 26006, Logroño, Spain.*

<sup>b</sup> *Centro de Investigación Biomédica de La Rioja (CIBIR), Fundación Rioja Salud, 26006, Logroño, Spain.*

#### Table of contents

|                                                                                                                                                                                                                                                     |     |
|-----------------------------------------------------------------------------------------------------------------------------------------------------------------------------------------------------------------------------------------------------|-----|
| <b>Fig. S1</b> <sup>1</sup> H NMR spectra of Hbt, <b>1b</b> , <b>2b</b> and <b>3b</b> in CDCl <sub>3</sub> at 298 K.....                                                                                                                            | S3  |
| <b>Fig. S2</b> <sup>1</sup> H NMR spectra of <b>1c</b> CDCl <sub>3</sub> at 298 K and at 223 K .....                                                                                                                                                | S4  |
| <b>Fig. S3</b> Variable temperature <sup>19</sup> F NMR spectra of <b>1a</b> in CDCl <sub>3</sub> .....                                                                                                                                             | S5  |
| <b>Fig. S4</b> Crystal packing of <b>1a</b> .....                                                                                                                                                                                                   | S6  |
| <b>Fig. S5</b> View of the secondary interactions in the structure <b>1c</b> .0.75CH <sub>2</sub> Cl <sub>2</sub> .....                                                                                                                             | S7  |
| <b>Fig. S6</b> Crystal packing of the complex <b>2b</b> .....                                                                                                                                                                                       | S8  |
| <b>Fig. S7</b> Crystal packing of <b>3a</b> .....                                                                                                                                                                                                   | S9  |
| <b>Fig. S8</b> Crystal packing of <b>3b</b> .....                                                                                                                                                                                                   | S9  |
| <b>Fig. S9</b> Absorption spectra in CH <sub>2</sub> Cl <sub>2</sub> (5 x 10 <sup>-5</sup> M) at 298 K of a) ( <b>1b</b> , <b>2b</b> and <b>3b</b> ) and the Hbt ligand, b) ( <b>1c</b> and <b>2c</b> ) and the Hpq ligand.....                     | S10 |
| <b>Fig. S10</b> Excitation and emission spectra of <b>1a</b> , <b>1b</b> and <b>1c</b> in a) CH <sub>2</sub> Cl <sub>2</sub> 5 x 10 <sup>-5</sup> M at 298 K...                                                                                     | S11 |
| <b>Fig. S11</b> Excitation and emission spectra of <b>1a</b> , <b>1b</b> and <b>1c</b> in solid state a) 298 k, b) at 77 K....                                                                                                                      | S11 |
| <b>Fig. S12</b> Normalized excitation and emission spectra of different samples of <b>1a</b> and <b>1c</b> in solid state at 298 K: bulk material, ground solid) and crystals obtained from CH <sub>2</sub> Cl <sub>2</sub> / <i>n</i> -hexane..... | S12 |
| <b>Fig. S13</b> Excitation and emission spectra of <b>2a</b> , <b>2b</b> and <b>2c</b> a) in solid state at 298 K, b) in solid state at 77 K.....                                                                                                   | S13 |
| <b>Fig. S14</b> Excitation and emission spectra of <b>2a</b> , <b>2b</b> and <b>2c</b> in CH <sub>2</sub> Cl <sub>2</sub> 5 x 10 <sup>-5</sup> M at 77 K.....                                                                                       | S14 |
| <b>Fig. S15</b> Normalized excitation and emission spectra of <b>3a</b> and <b>3b</b> a) in solid state at 77 K, b)                                                                                                                                 |     |

|                                                                                                                                                                                                                                                  |         |
|--------------------------------------------------------------------------------------------------------------------------------------------------------------------------------------------------------------------------------------------------|---------|
| CH <sub>2</sub> Cl <sub>2</sub> 5x10 <sup>-5</sup> M at 77 K.....                                                                                                                                                                                | S14-S15 |
| <b>Table S1.</b> DFT optimized geometries for ground state and triplet state of complexes <b>1a</b> , <b>1c</b> <b>2b</b> and <b>3a</b> .....                                                                                                    | S16-S17 |
| <b>Fig. S16</b> Optimized structures of S <sub>0</sub> and T <sub>1</sub> states of <b>1a</b> , <b>1c</b> <b>2b</b> and <b>3a</b> .....                                                                                                          | S17-S18 |
| <b>Table S2</b> Composition (%) of Frontier MOs in the ground state for complexes <b>1a</b> , <b>1c</b> , <b>2b</b> and <b>3a</b> in gas phase.....                                                                                              | S19     |
| <b>Fig. S17</b> Selected frontier Molecular Orbitals for complex <b>1a</b> .....                                                                                                                                                                 | S20     |
| <b>Fig. S18</b> Selected frontier Molecular Orbitals for complex <b>1c</b> .....                                                                                                                                                                 | S21     |
| <b>Fig. S19</b> Selected frontier Molecular Orbitals for complex <b>2b</b> .....                                                                                                                                                                 | S22     |
| <b>Fig. S20</b> Selected frontier Molecular Orbitals for complex <b>3a</b> .....                                                                                                                                                                 | S23     |
| <b>Table S3.</b> Selected vertical excitation energies singlets (S <sub>0</sub> ) computed by TD-DFT/ SCRF (CH <sub>2</sub> Cl <sub>2</sub> ) with the orbitals involved for complexes for <b>1a</b> , <b>1c</b> , <b>2b</b> and <b>3a</b> ..... | S24-S25 |
| <b>Table S4.</b> Composition (%) of frontier molecular orbitals in the first triple-state for <b>1a</b> , <b>c</b> , <b>2b</b> and <b>3a</b> in gas phase .....                                                                                  | S26     |
| <b>Fig. S21</b> UV-vis absorption spectra of a) <b>3a</b> , b) <b>3b</b> and c) <b>4</b> , (5 x 10 <sup>-5</sup> M) recorded in DMSO (<1%)-cellular medium .....                                                                                 | S27     |
| <b>Fig. S22</b> Curves for determination of the IC <sub>50</sub> cytotoxicity values of <b>3a</b> , <b>3b</b> and <b>4</b> .....                                                                                                                 | S28     |
| <b>Fig. S23</b> Fluorescence images of mouse lung embryonic fibroblasts (LMEFs) treated with <b>3a</b> , and A549 and NL20 cells treated with complex <b>4</b> .....                                                                             | S29     |
| <b>Fig. S24</b> Comparative normalized excitation and emission spectra of <b>3a</b> in CH <sub>2</sub> Cl <sub>2</sub> and DMSO (5 x 10 <sup>-5</sup> M) at 298 K.....                                                                           | S30     |
| <b>Table S5.</b> X-ray Crystallographic Data for <b>1a</b> , <b>1c</b> .0.75CH <sub>2</sub> Cl <sub>2</sub> , <b>2b</b> , <b>3a</b> and <b>3b</b> .....                                                                                          | S31     |
| Complete reference 39.....                                                                                                                                                                                                                       | S31     |

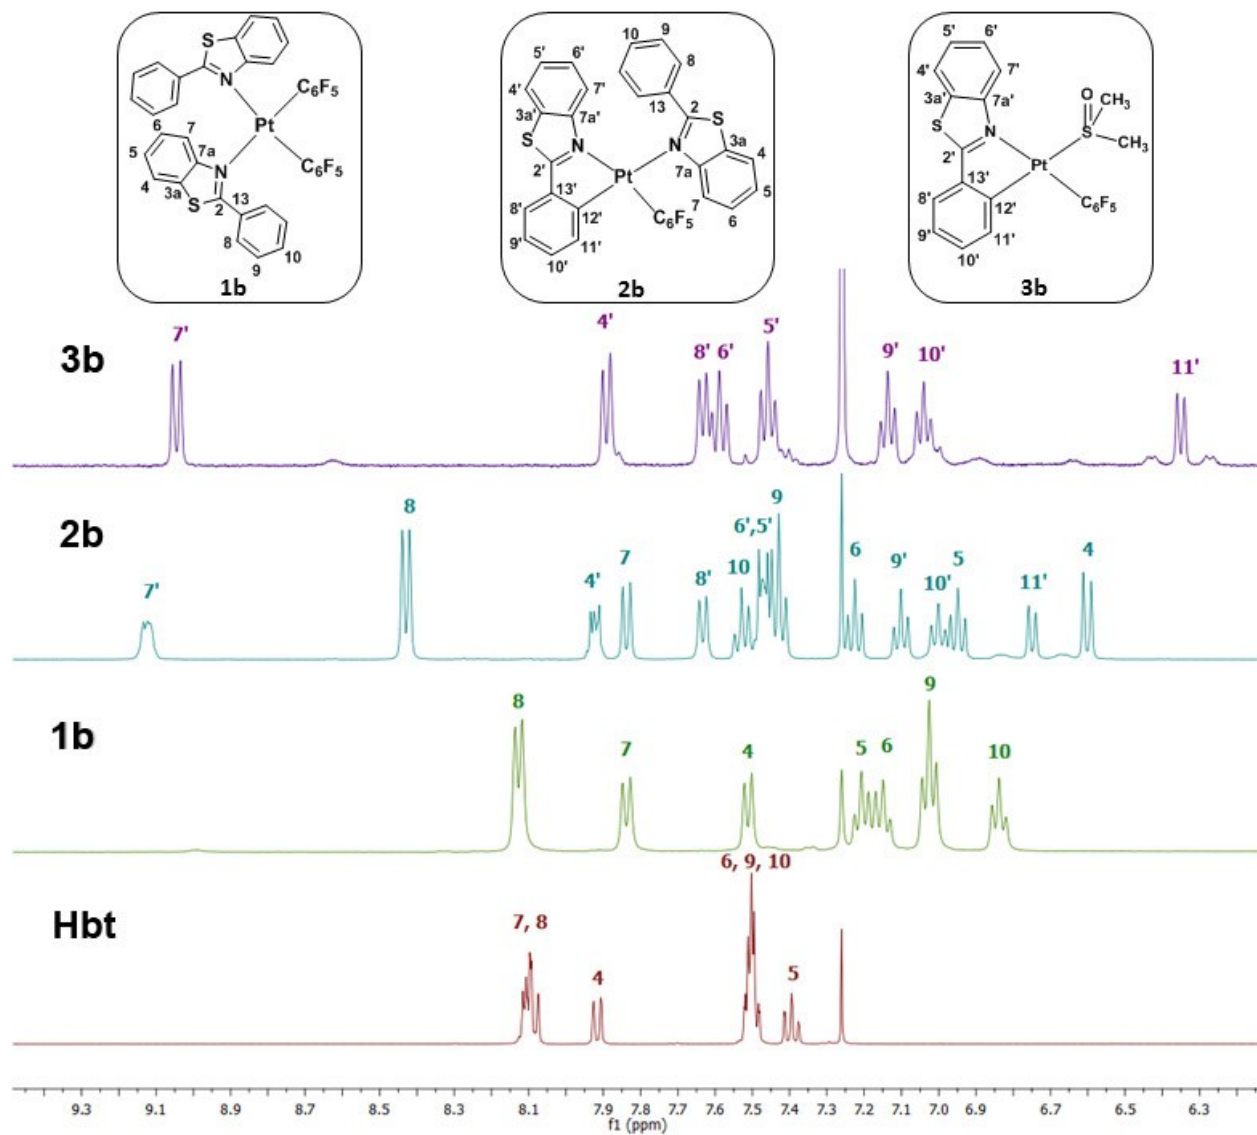

Fig. S1 Selected region of the  $^1\text{H}$  NMR spectra of Hbt, **1b**, **2b** and **3b** in  $\text{CDCl}_3$  at 298 K

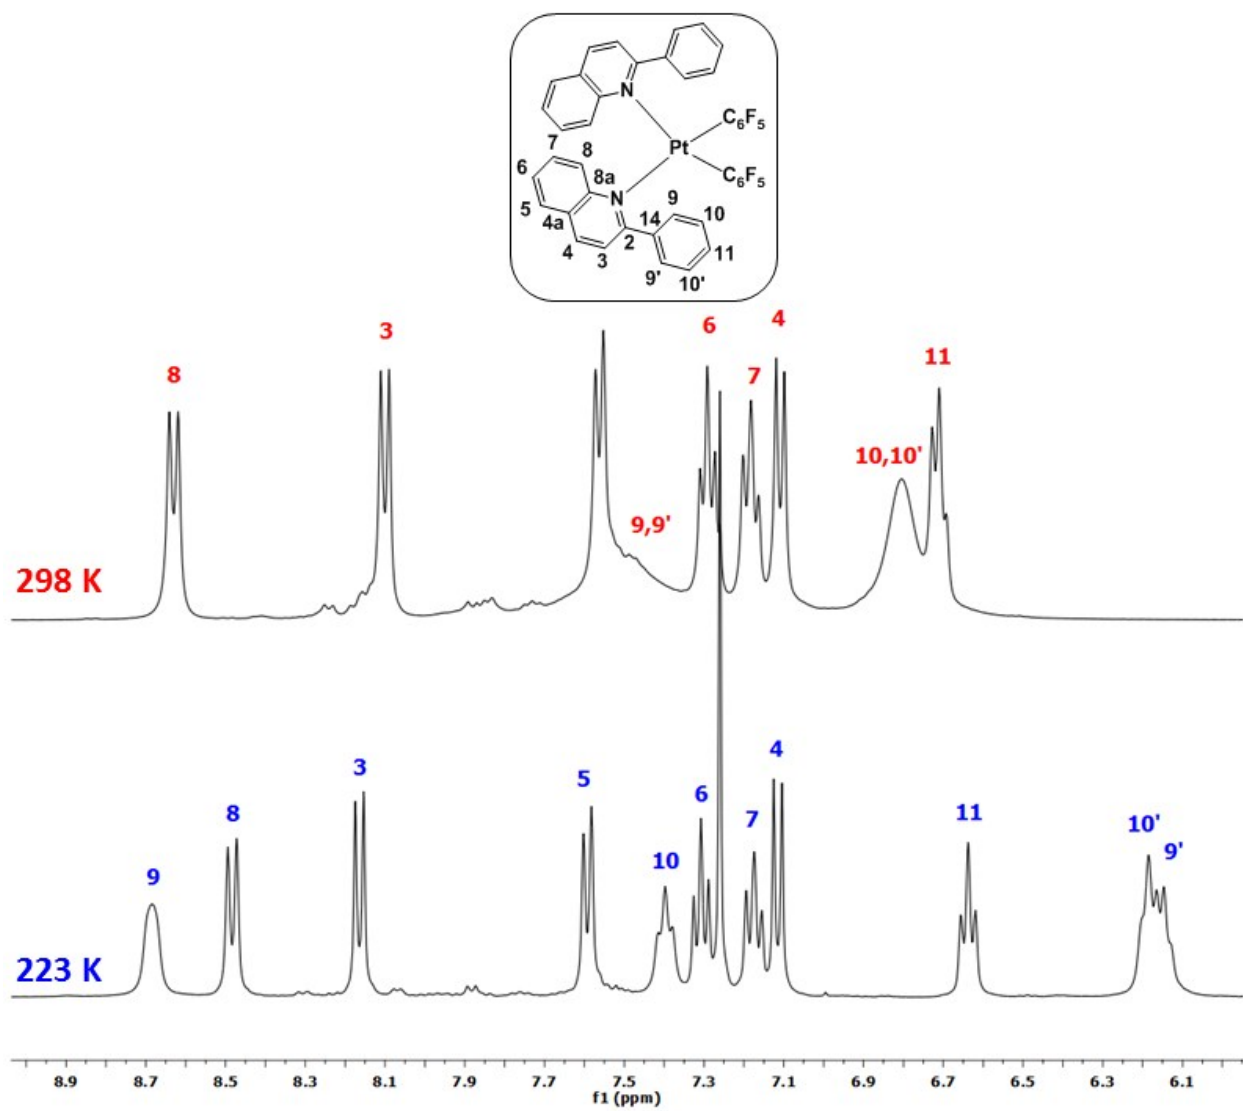

Fig. S2 <sup>1</sup>H NMR spectra of **1c** CDCl<sub>3</sub> at 298 K and at 223 K

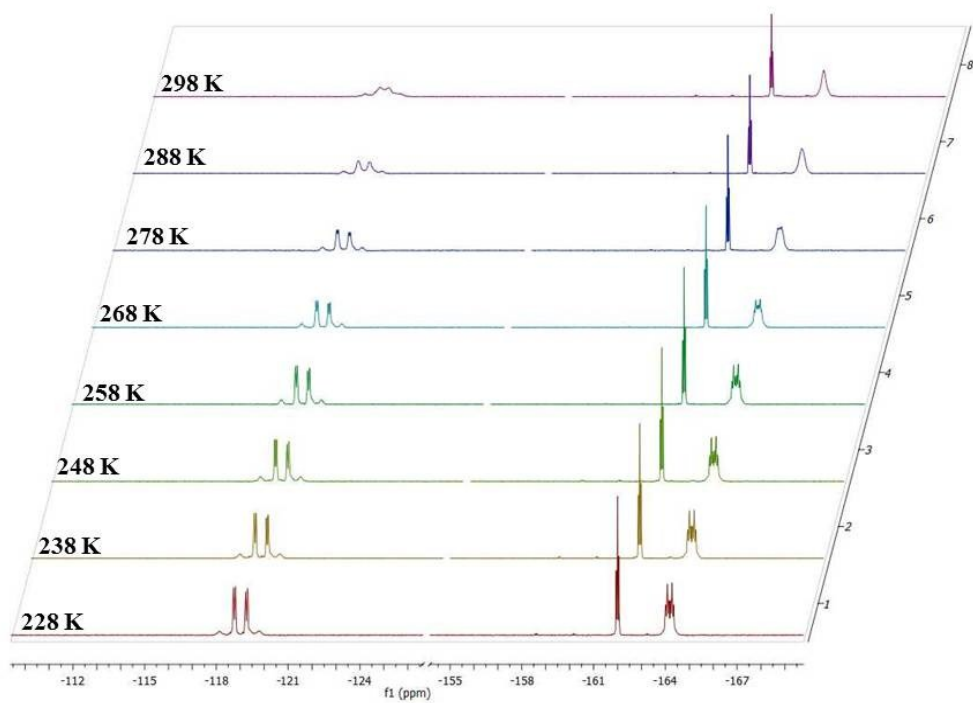

**Fig. S3** Variable temperature  $^{19}\text{F}$  NMR spectra of **1a** in  $\text{CDCl}_3$

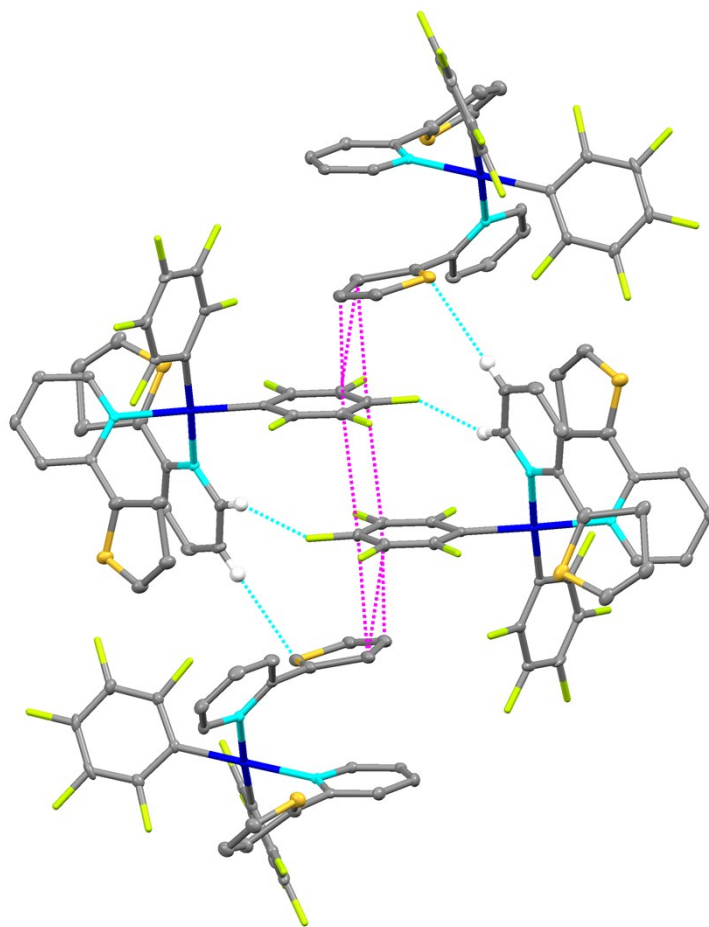

**Fig. S4** Crystal packing of **1a** showing the intermolecular contacts. The supramolecular packing is formed by chains supported by intermolecular  $\pi \cdots \pi$  (pink lines) involving Hthpy and  $C_6F_5$  ligands with interplanar distances of 3.36 Å. These  $\pi \cdots \pi$  interactions are supported by  $F_{C_6F_5} \cdots H_{Hthpy}$  (2.38 Å) and  $H_{Hthpy} \cdots S_{Hthpy}$  (2.86 Å) secondary interactions (blue lines).

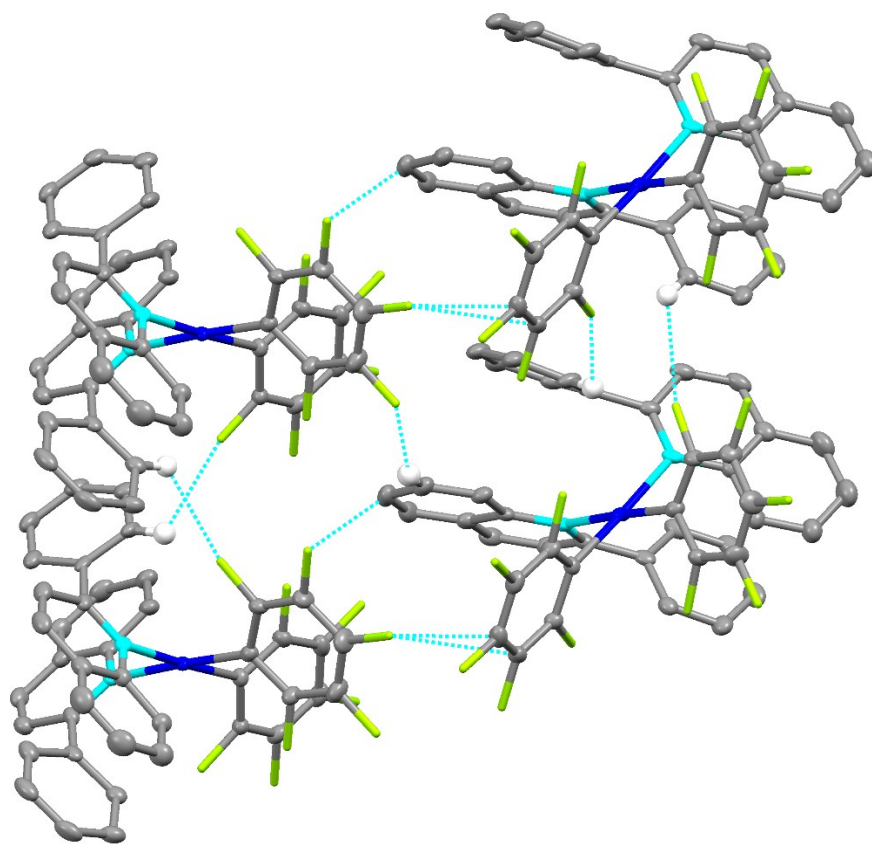

**Fig. S5** View of the secondary interactions in the structure **1c**. $0.75\text{CH}_2\text{Cl}_2$ .  $\text{F}_{\text{C6F5}} \cdots \text{C}_{\text{C6F5}}$  (3.04 Å),  $\text{F}_{\text{C6F5}} \cdots \text{C}_{\text{Hpq}}$  (3.15 Å) and  $\text{F}_{\text{C6F5}} \cdots \text{H}_{\text{Hpq}}$  (2.59 Å) interactions are observed.

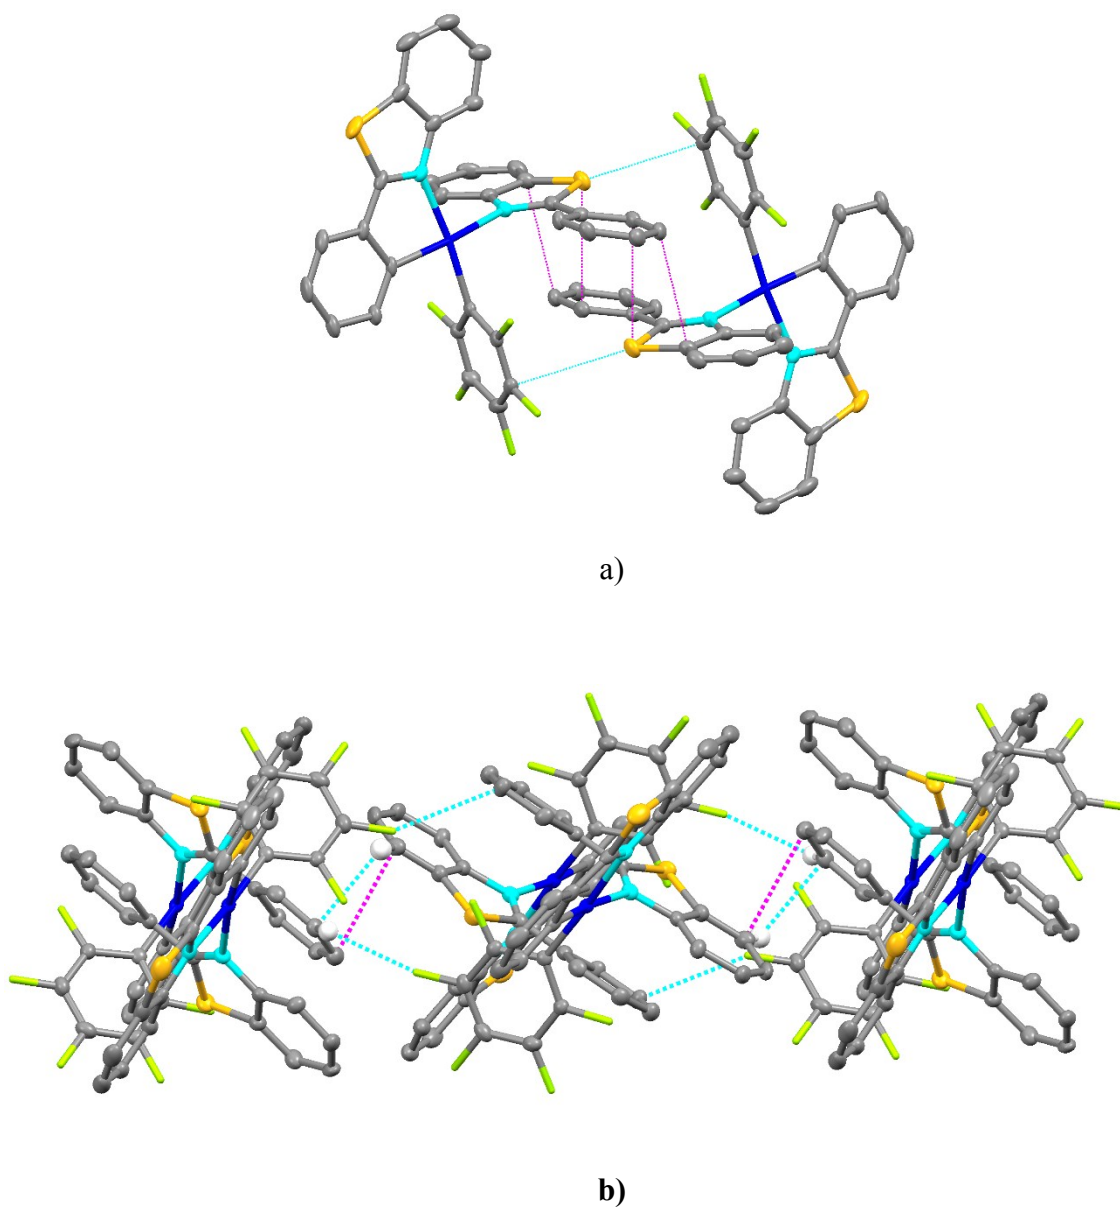

**Fig. S6** Crystal packing of the complex **2b** showing a) The supramolecular packing of the dimers supported by intermolecular  $\pi \cdots \pi$  interactions (pink lines) involving Hbt ligands with interplanar distances of 3.31 Å ( $C_{Hbt} \cdots C_{Hbt}$ ) and 3.50 Å ( $S_{Hbt} \cdots C_{Hbt}$ ) supported by  $C_{C6F5} \cdots S_{bt}$  (3.48 Å) secondary interactions (blue). b) The disposition of the chains showing the interactions between dimers supported by  $\pi \cdots \pi$  interactions ( $C_{bt} \cdots C_{bt}$ , 3.35, pink lines) and weak interactions (blue) [ $H_{bt} \cdots F_{C6F5}$  (2.66 Å),  $H_{bt} \cdots C_{bt}$  (2.81 Å),  $C_{bt} \cdots F_{C6F5}$  (3.12 Å)]



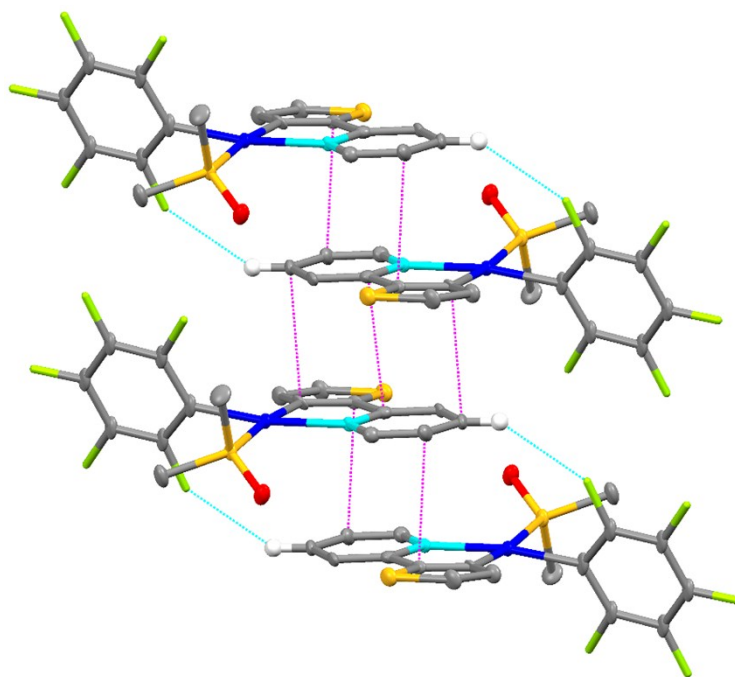

**Fig. S7** Crystal packing of **3a** showing the intermolecular contacts. The supramolecular packing is formed by chains supported by intermolecular  $\pi \cdots \pi$  (pink lines) involving two thpy ligands (3.33-3.40 Å). These  $\pi \cdots \pi$  interactions are supported by  $F_{C6F5} \cdots H_{thpy}$  (2.60 Å) (blue lines).

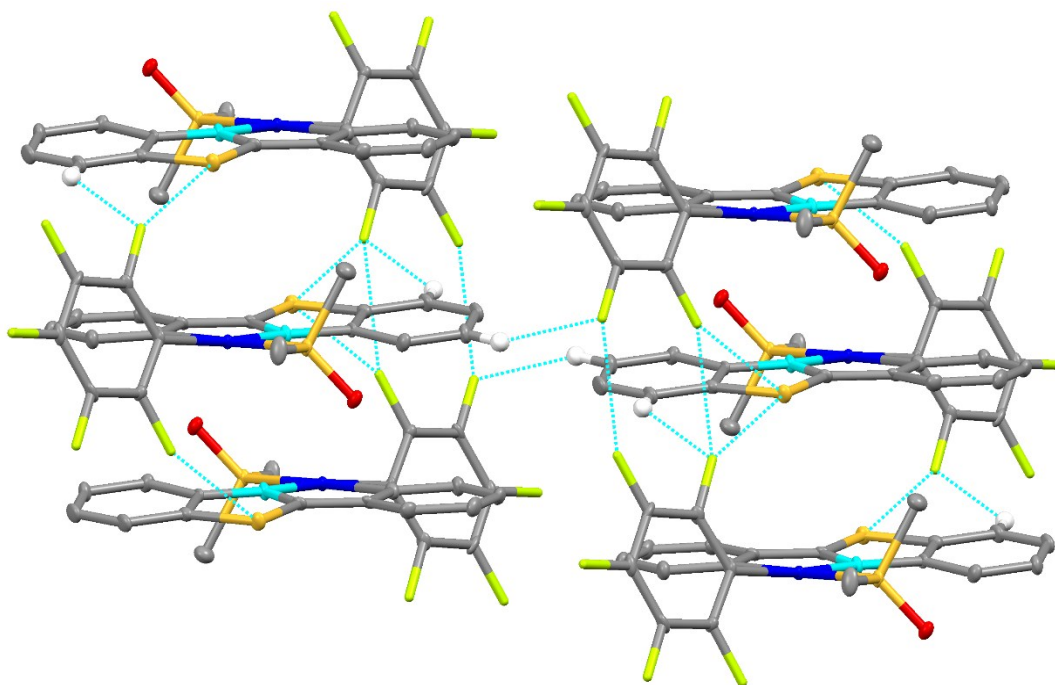

**Fig. S8** View of the secondary interactions present in the structure **3b** showing the interactions  $F_{C6F5} \cdots F_{C6F5}$  (2.84 Å),  $F_{C6F5} \cdots H_{bt}$  (2.55-2.64 Å) and  $F_{C6F5} \cdots S_{bt}$  (3.15-3.25 Å).

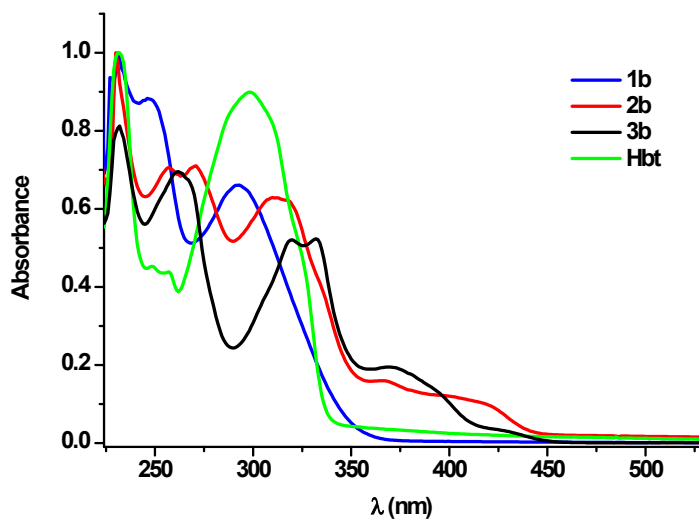

a)

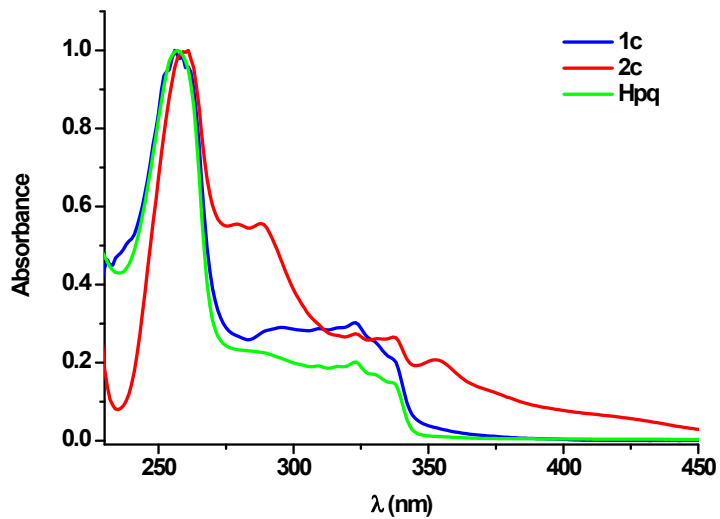

b)

**Fig. S9.** Absorption spectra in  $\text{CH}_2\text{Cl}_2$  ( $5 \times 10^{-5}$  M) at 298 K of a) the bt series of complexes (**1b**, **2b** and **3b**) and the Hbt ligand, b) the pq series of complexes (**1c** and **2c**) and the Hpq ligand

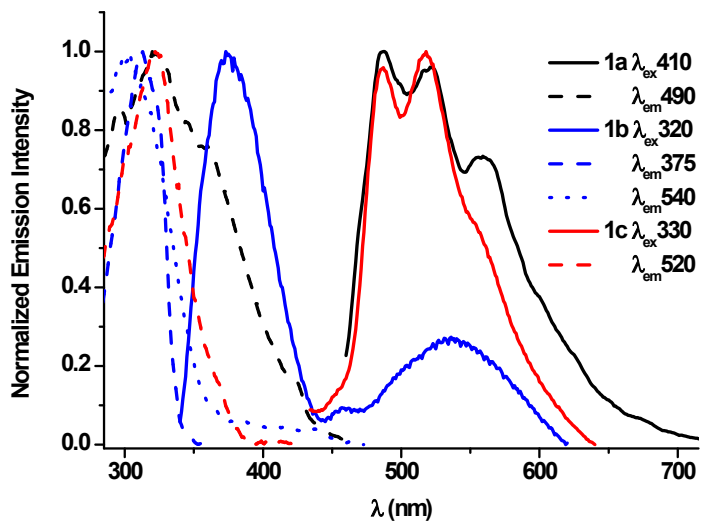

**Fig. S10.** Normalized excitation and emission spectra of **1a**, **1b** and **1c** in  $\text{CH}_2\text{Cl}_2$   $5 \times 10^{-5}$  M at 298 K

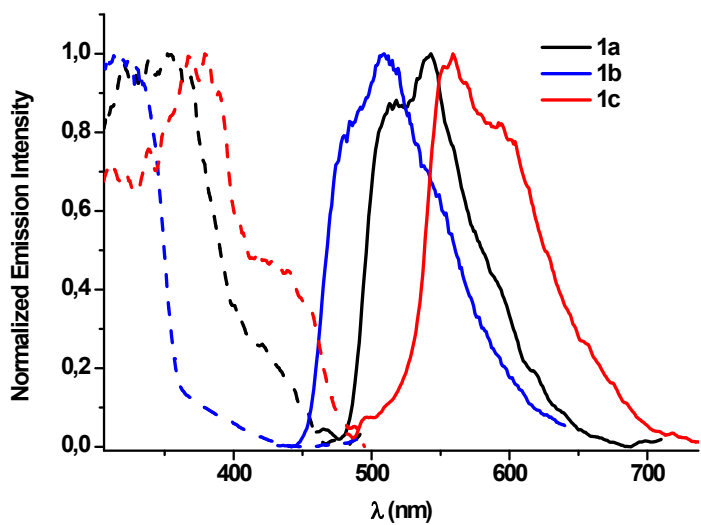

**Fig. S11** Normalized excitation and emission spectra of **1a**, **1b** and **1c** in solid state at 77 K.

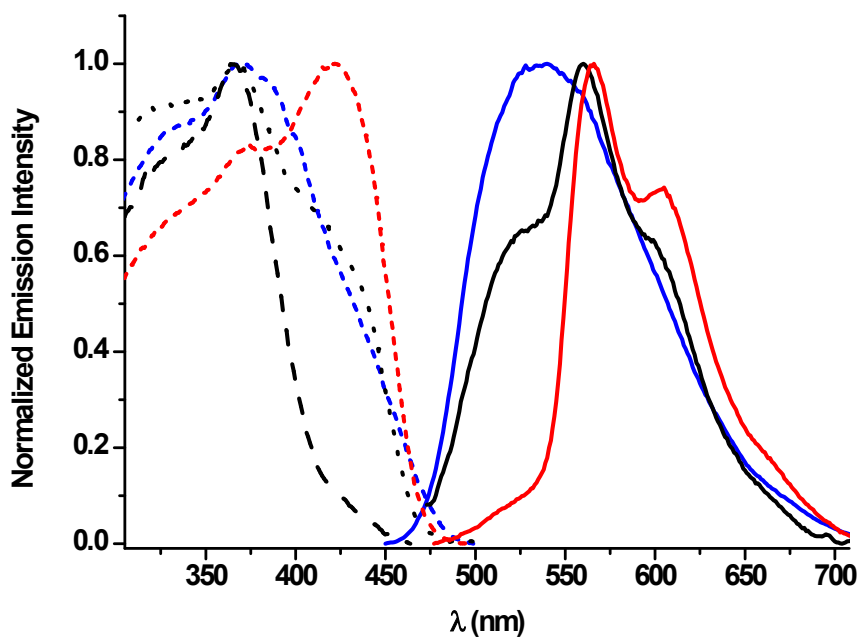

**Fig. S12a** Normalized excitation and emission spectra of different samples of **1a** in solid state at 298K: bulk material (black; the shape depends on the excitation wavelength), ground solid (red) and crystals obtained from  $\text{CH}_2\text{Cl}_2/n$ -hexane (blue) ( $\lambda_{\text{exc}}$  365 nm)

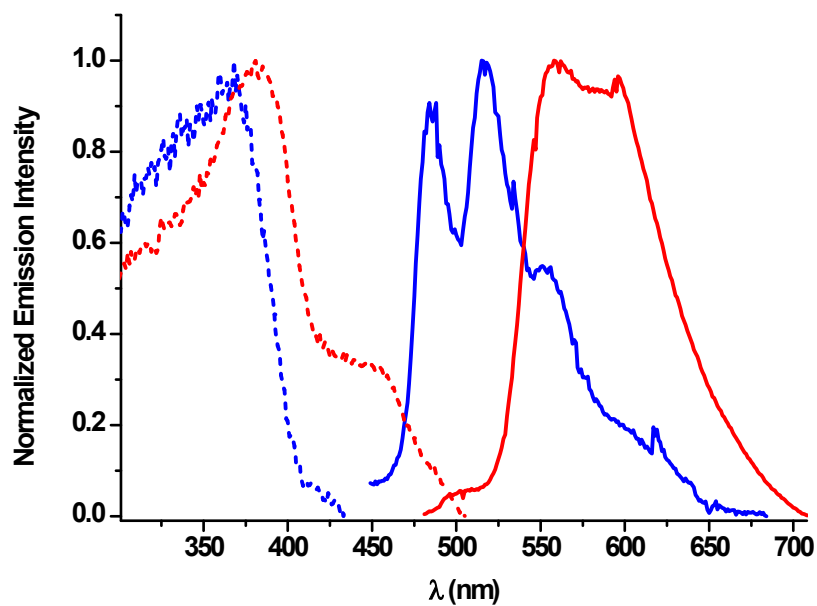

**Fig. S12b** Normalized excitation and emission spectra of different samples of **1c** in solid state at 298K: bulk material or ground solid (red) and crystals obtained from  $\text{CH}_2\text{Cl}_2/n$ -hexane (blue) ( $\lambda_{\text{exc}}$  365 nm)

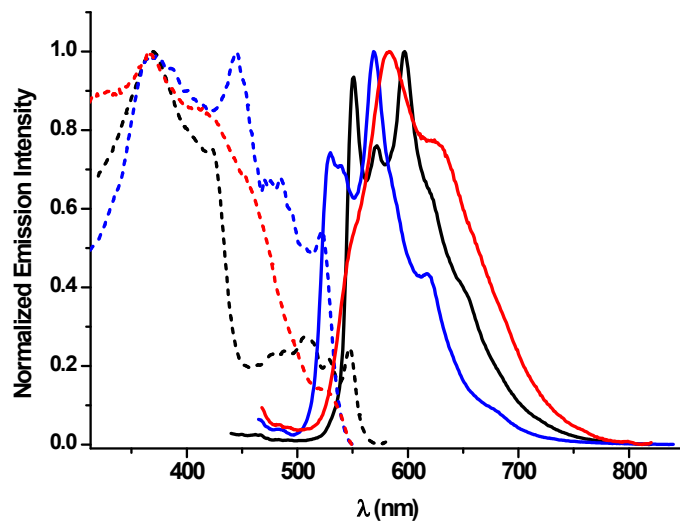

Fig. S13a Normalized excitation and emission spectra of **2a**, **2b** and **2c** in solid state at 298 K

Fig. S13b Normalized excitation and emission spectra of **2a**, **2b** and **2c** in solid state at 77 K.

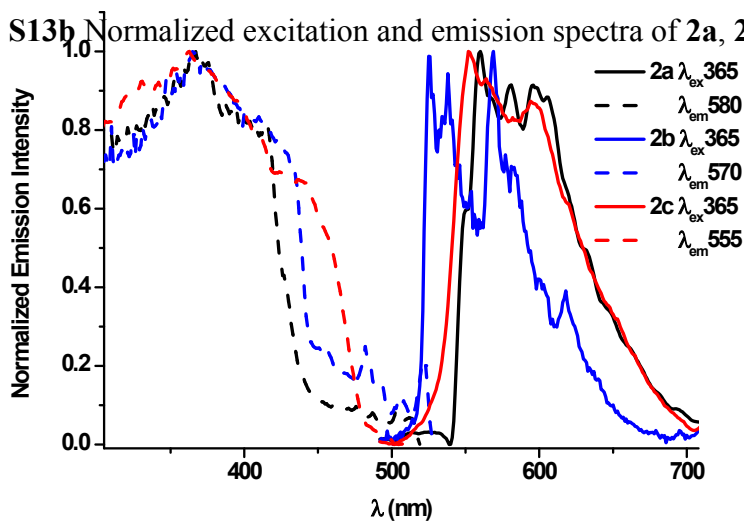

Fig. S14  
excitation  
spectra of  
in  $\text{CH}_2\text{Cl}_2$   
77 K.

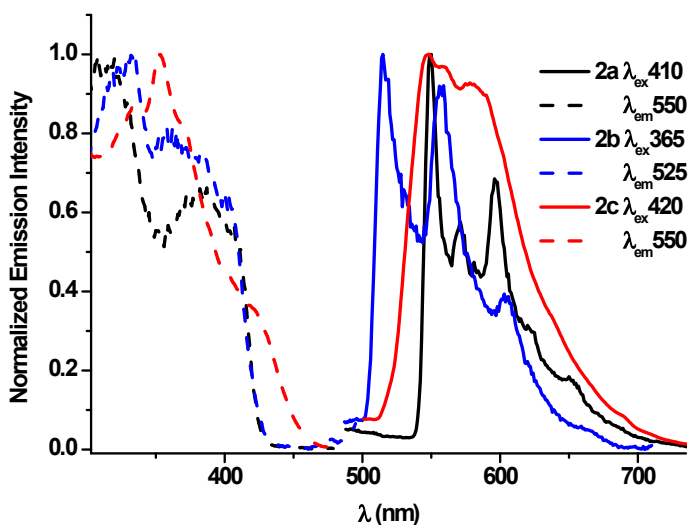

Normalized  
and emission  
**2a**, **2b** and **2c**  
 $5 \times 10^{-5}$  M at

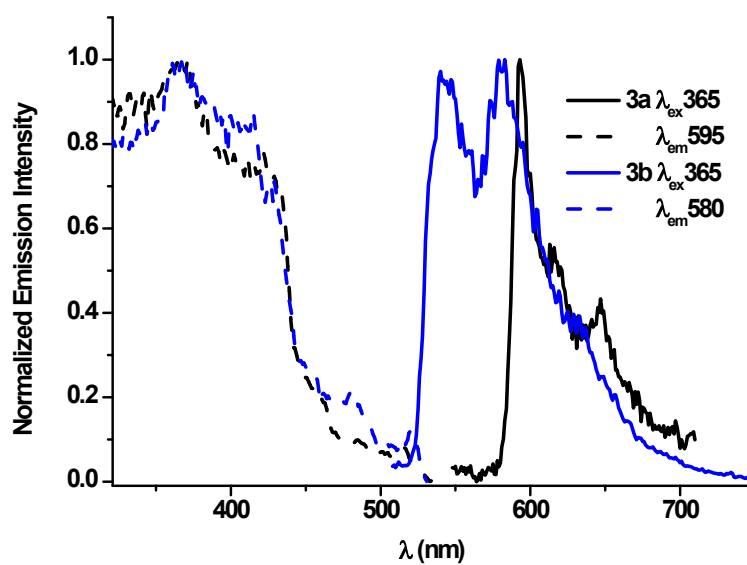

**Fig. S15a** Normalized excitation and emission spectra of **3a** and **3b** in solid state at 77 K

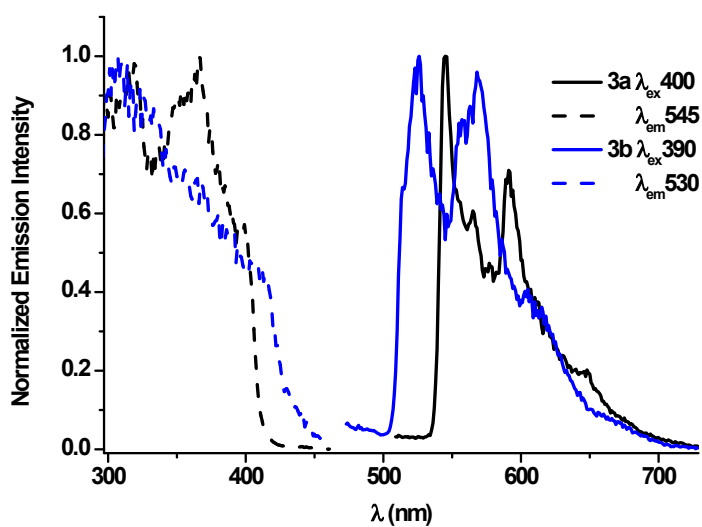

b)

**Fig. S15b** Normalized excitation and emission spectra of **3a** and **3b** in  $\text{CH}_2\text{Cl}_2$   $5 \times 10^{-5} \text{ M}$  at 77 K.

**Table S1.** DFT optimized geometries for ground state and triplet state of complexes **1a**, **1c** **2b** and **3a**

| <b>1a</b>      |           |                |                |
|----------------|-----------|----------------|----------------|
|                | X-Ray     | S <sub>0</sub> | T <sub>1</sub> |
| Pt-N(1)        | 2.110(3)  | 2.214          | 2.220          |
| Pt-N(2)        | 2.111(3)  | 2.217          | 2.195          |
| Pt-C(19)       | 2.012(4)  | 2.021          | 2.023          |
| Pt-C(25)       | 2.015(4)  | 2.021          | 2.029          |
| C(14)-C(15)    | 1.464(6)  | 1.469          | 1.393          |
| Pt-H(16)       | 3.044     | 2.895          | 2.675          |
| N(1)-Pt-N(2)   | 88.97(12) | 89.65          | 88.62          |
| C(19)-Pt-N(2)  | 88.80(14) | 91.01          | 92.41          |
| C(25)-Pt-N(1)  | 89.79(14) | 91.88          | 91.77          |
| C(19)-Pt-C(25) | 92.46(16) | 87.45          | 97.20          |

| <b>1c</b>      |          |                |                |
|----------------|----------|----------------|----------------|
|                | X-Ray    | S <sub>0</sub> | T <sub>1</sub> |
| Pt-N(1)        | 2.173(6) | 2.251          | 2.163          |
| Pt-N(2)        | 2.133(5) | 2.251          | 2.254          |
| Pt-C(31)       | 2.012(8) | 2.030          | 2.047          |
| Pt-C(37)       | 2.011(6) | 2.030          | 2.023          |
| Pt-H(14)       | 2.773    | 2.677          | 2.665          |
| Pt-H(29)       | 2.759    | 2.677          | 2.710          |
| N(2)-Pt-N(1)   | 90.1(2)  | 92.7           | 92.5           |
| C(31)-Pt-N(2)  | 91.5(2)  | 90.9           | 90.0           |
| C(31)-Pt-C(37) | 87.2(3)  | 85.5           | 85.9           |
| C(37)-Pt-N(1)  | 91.4(2)  | 90.9           | 91.5           |

| <b>2b</b> |          |                |                |
|-----------|----------|----------------|----------------|
|           | X-Ray    | S <sub>0</sub> | T <sub>1</sub> |
| Pt-N(1)   | 2.101(3) | 2.194          | 2.130          |
| Pt-N(2)   | 2.152(3) | 2.244          | 2.263          |
| Pt-C(9)   | 2.007(3) | 2.004          | 1.981          |
| Pt-C(27)  | 2.005(4) | 2.019          | 2.034          |
| Pt-H(22)  | 2.587    | 2.831          | 2.890          |
| Pt-H(15)  | 2.786    | 2.881          | 2.908          |

|               |           |       |        |
|---------------|-----------|-------|--------|
| N(1)-Pt-N(2)  | 96.90(12) | 99.14 | 98.61  |
| C(27)-Pt-N(2) | 90.65(12) | 87.20 | 86.00  |
| C(27)-Pt-C(9) | 91.20(15) | 93.72 | 93.36  |
| C(9)-Pt-N(1)  | 81.37(15) | 79.95 | 82.034 |

| <b>3a</b>        |           |                |                |
|------------------|-----------|----------------|----------------|
|                  | X-Ray     | S <sub>0</sub> | T <sub>1</sub> |
| Pt-N(1)          | 2.009(7)  | 2.168          | 2.139          |
| Pt-C(1)          | 2.049(9)  | 2.005          | 1.975          |
| Pt-S(2)          | 2.296(2)  | 2.438          | 2.450          |
| Pt-C(10)         | 2.007(10) | 2.034          | 2.041          |
| O(1)-S(2)        | 1.472(6)  | 1.510          | 1.510          |
| S(2)-C(16)       | 1.789(9)  | 1.819          | 1.820          |
| S(2)-C(17)       | 1.795(9)  | 1.820          | 1.821          |
| C(10)-Pt(1)-C(1) | 91.5(4)   | 91.9           | 91.4           |
| C(1)-Pt(1)-N(1)  | 79.0(3)   | 79.8           | 81.1           |
| C(10)-Pt(1)-S(2) | 92.0(3)   | 90.6           | 90.2           |
| N(1)-Pt-S(2)     | 98.09(18) | 97.8           | 97.4           |
| O(1)-S(2)-Pt(1)  | 116.9(3)  | 120.1          | 120.4          |

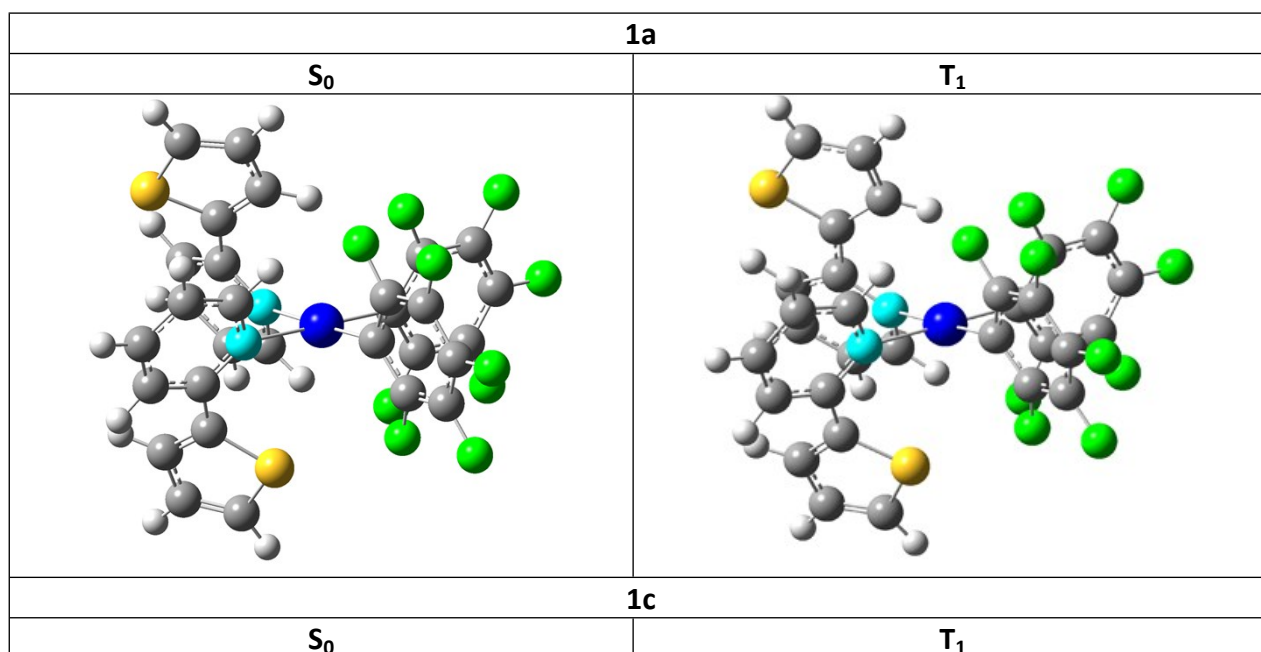



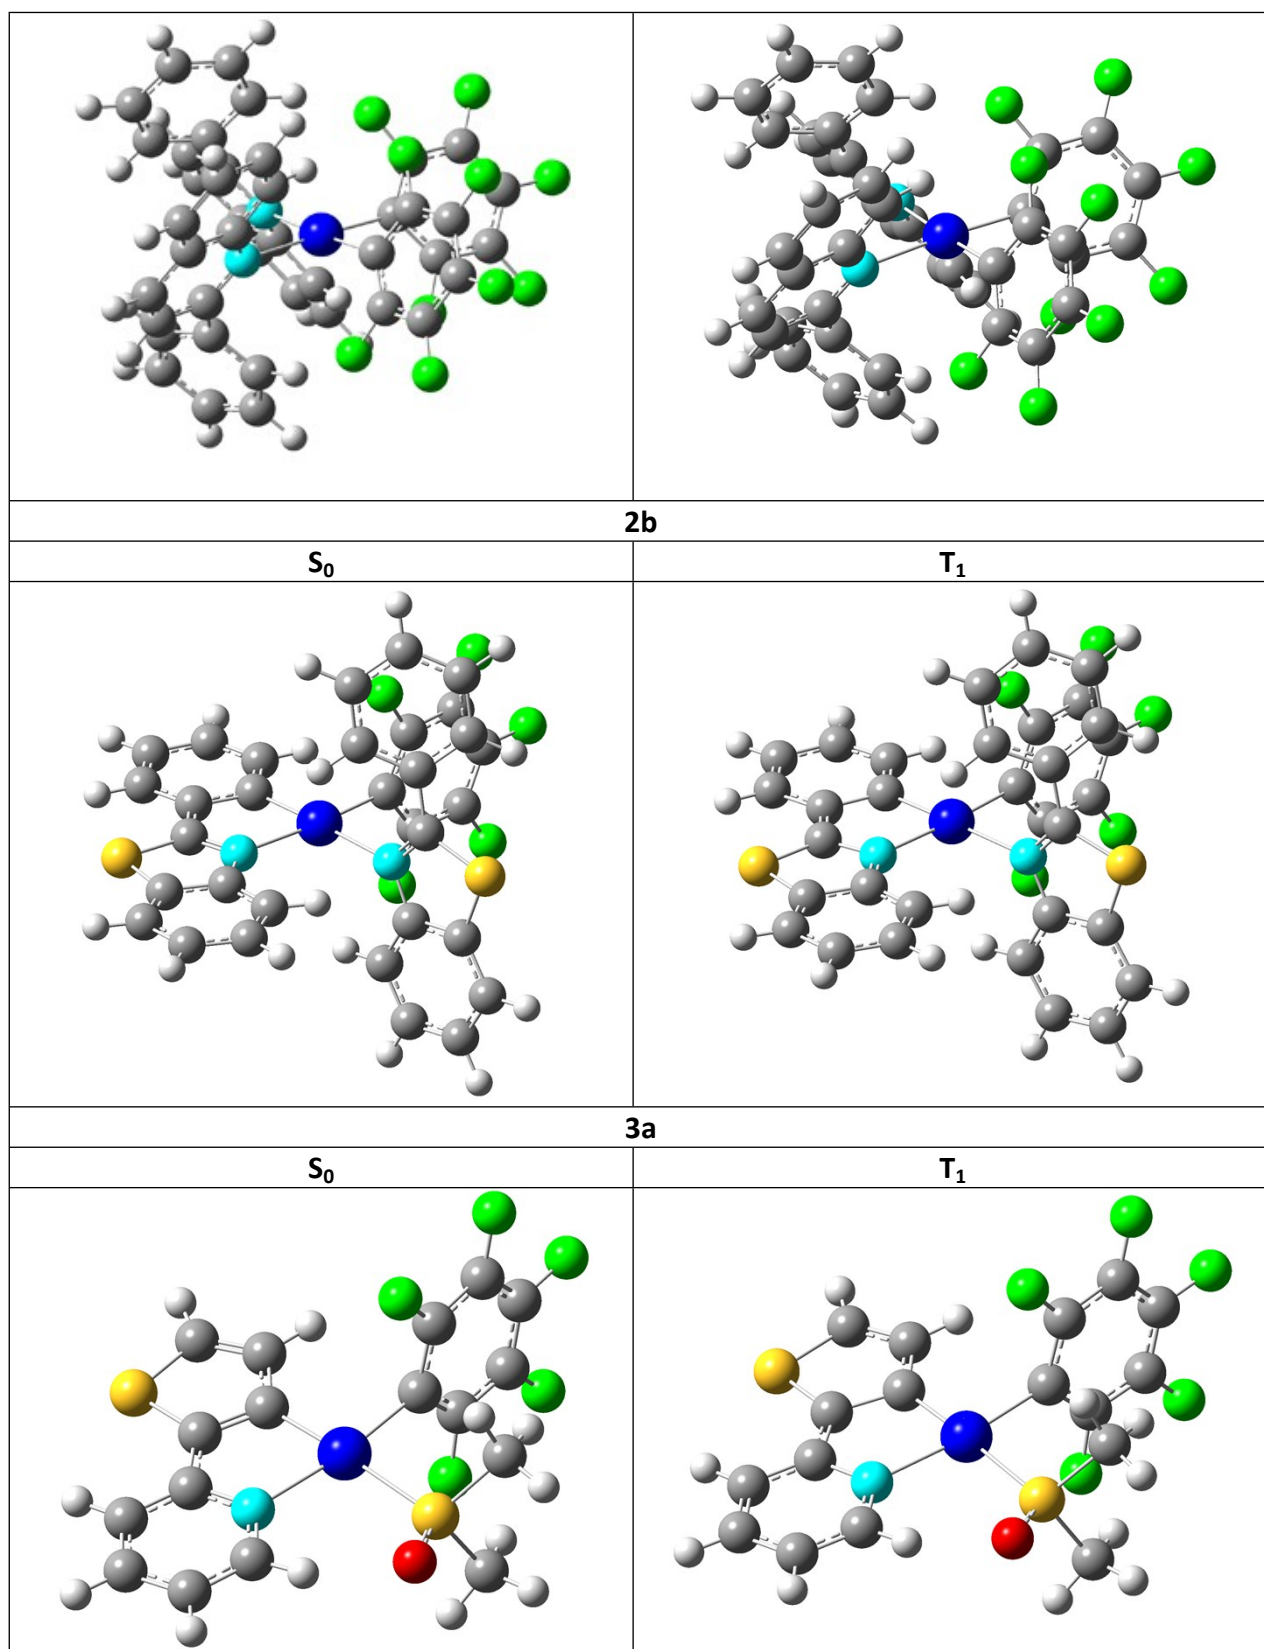

**Fig. S16** Optimized structures of  $S_0$  and  $T_1$  states of **1a**, **1c**, **2b** and **3a**

**Table S2** Composition (%) of Frontier MOs in the ground state for complexes **1a**, **1c**, **2b** and **3a** in gas phase.

| <b>1a</b> |       |                                   |                                   |                               |           |           | <b>1c</b> |                                   |                                   |      |        |         |
|-----------|-------|-----------------------------------|-----------------------------------|-------------------------------|-----------|-----------|-----------|-----------------------------------|-----------------------------------|------|--------|---------|
| MO        | eV    | C <sub>6</sub> F <sub>5</sub> (1) | C <sub>6</sub> F <sub>5</sub> (2) | Pt                            | Hthpy (1) | Hthpy (2) | eV        | C <sub>6</sub> F <sub>5</sub> (1) | C <sub>6</sub> F <sub>5</sub> (2) | Pt   | Hpq(1) | Hpq (2) |
| LUMO+5    | -0.15 | 1                                 | 1                                 | 2                             | 75        | 22        | -0.3      | 2                                 | 2                                 | 2    | 49     | 45      |
| LUMO+4    | -0.52 | 24                                | 25                                | 34                            | 10        | 8         | -0.53     | 25                                | 25                                | 31   | 10     | 10      |
| LUMO+3    | -1.03 | 2                                 | 1                                 | 2                             | 65        | 30        | -0.81     | 1                                 | 1                                 | 1    | 49     | 48      |
| LUMO+2    | -1.18 | 0                                 | 1                                 | 1                             | 31        | 67        | -0.89     | 0                                 | 0                                 | 1    | 49     | 50      |
| LUMO+1    | -1.66 | 0                                 | 0                                 | 2                             | 72        | 26        | -1.92     | 0                                 | 0                                 | 1    | 49     | 49      |
| LUMO      | -1.74 | 0                                 | 0                                 | 1                             | 27        | 72        | -2.02     | 0                                 | 0                                 | 1    | 49     | 49      |
| HOMO      | -5.82 | 3                                 | 3                                 | 73                            | 10        | 11        | -5.86     | 4                                 | 4                                 | 82   | 5      | 5       |
| HOMO-1    | -6.02 | 34                                | 31                                | 32                            | 2         | 1         | -6.01     | 28                                | 28                                | 30   | 7      | 7       |
| HOMO-2    | -6.23 | 17                                | 19                                | 33                            | 14        | 17        | -6.15     | 26                                | 26                                | 30   | 9      | 9       |
| HOMO-3    | -6.39 | 18                                | 1                                 | 16                            | 45        | 21        | -6.37     | 46                                | 49                                | 3    | 1      | 1       |
| HOMO-4    | -6.39 | 41                                | 45                                | 3                             | 4         | 7         | -6.38     | 6                                 | 4                                 | 39   | 26     | 26      |
| HOMO-5    | -6.46 | 41                                | 52                                | 1                             | 5         | 1         | -6.48     | 48                                | 47                                | 4    | 1      | 1       |
| <b>2b</b> |       |                                   |                                   |                               |           |           | <b>3a</b> |                                   |                                   |      |        |         |
|           | eV    | bt                                | Hbt                               | C <sub>6</sub> F <sub>5</sub> | Pt        |           | eV        | C <sub>6</sub> F <sub>5</sub>     | thpy                              | dmsO | Pt     |         |
| LUMO+5    | -0.3  | 21                                | 45                                | 16                            | 13        | 0.1       | 31        | 11                                | 27                                | 30   |        |         |
| LUMO+4    | -0.43 | 37                                | 57                                | 2                             | 4         | 0.03      | 82        | 5                                 | 1                                 | 11   |        |         |
| LUMO+3    | -0.52 | 51                                | 47                                | 0                             | 2         | 0.01      | 65        | 7                                 | 15                                | 13   |        |         |
| LUMO+2    | -0.61 | 15                                | 77                                | 2                             | 5         | -0.6      | 33        | 24                                | 11                                | 32   |        |         |
| LUMO+1    | -1.91 | 4                                 | 94                                | 0                             | 1         | -1.05     | 0         | 98                                | 0                                 | 1    |        |         |
| LUMO      | -1.94 | 91                                | 5                                 | 0                             | 4         | -1.84     | 1         | 89                                | 2                                 | 8    |        |         |
| HOMO      | -5.82 | 63                                | 1                                 | 0                             | 35        | -5.74     | 0         | 85                                | 1                                 | 14   |        |         |
| HOMO-1    | -5.97 | 4                                 | 5                                 | 4                             | 87        | -6.33     | 68        | 5                                 | 3                                 | 25   |        |         |
| HOMO-2    | -6.12 | 3                                 | 3                                 | 66                            | 28        | -6.41     | 15        | 4                                 | 0                                 | 81   |        |         |
| HOMO-3    | -6.32 | 58                                | 1                                 | 3                             | 38        | -6.46     | 50        | 42                                | 0                                 | 7    |        |         |
| HOMO-4    | -6.39 | 1                                 | 1                                 | 99                            | 0         | -6.51     | 49        | 41                                | 0                                 | 10   |        |         |
| HOMO-5    | -6.53 | 69                                | 9                                 | 2                             | 20        | -6.92     | 4         | 14                                | 0                                 | 81   |        |         |

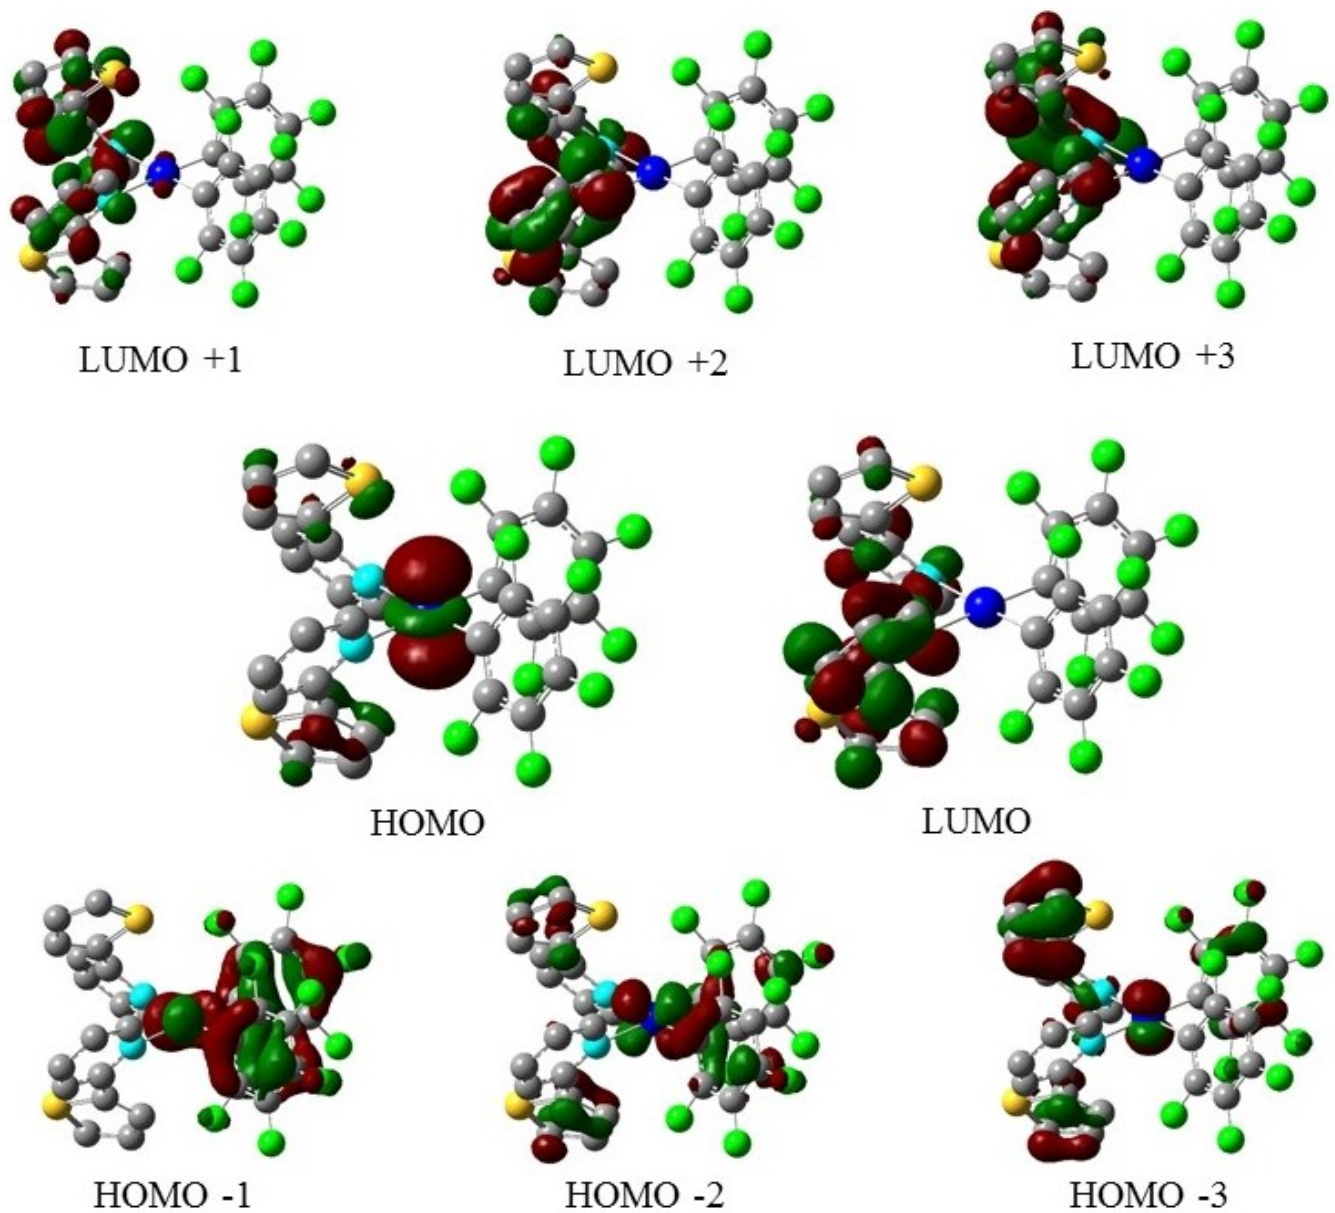

**Fig. S17** Selected frontier Molecular Orbitals for complex **1a**.

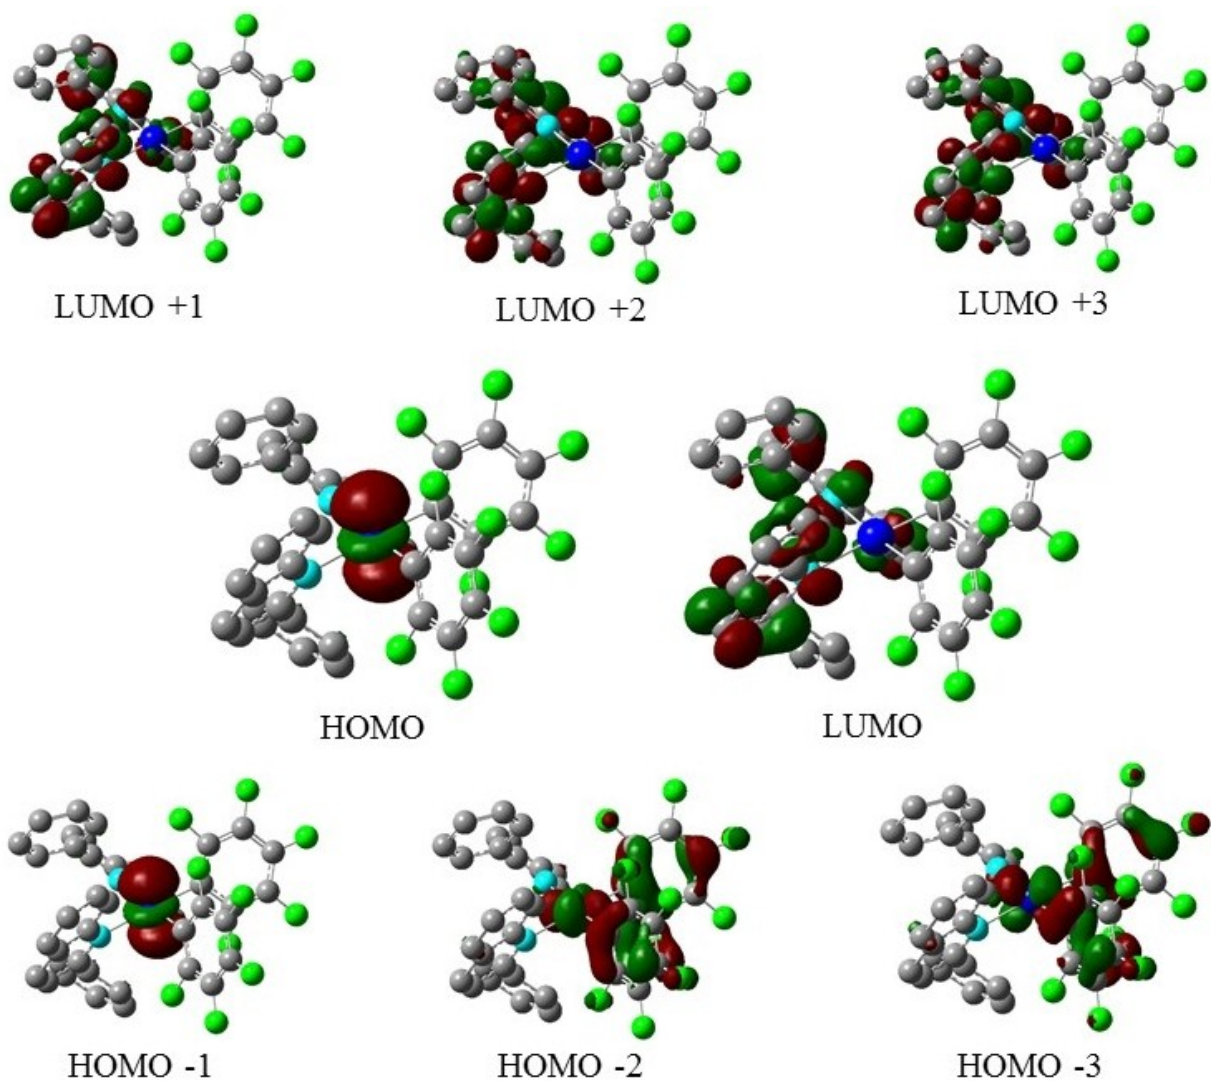

**Fig. S18** Selected frontier Molecular Orbitals for complex 1c.

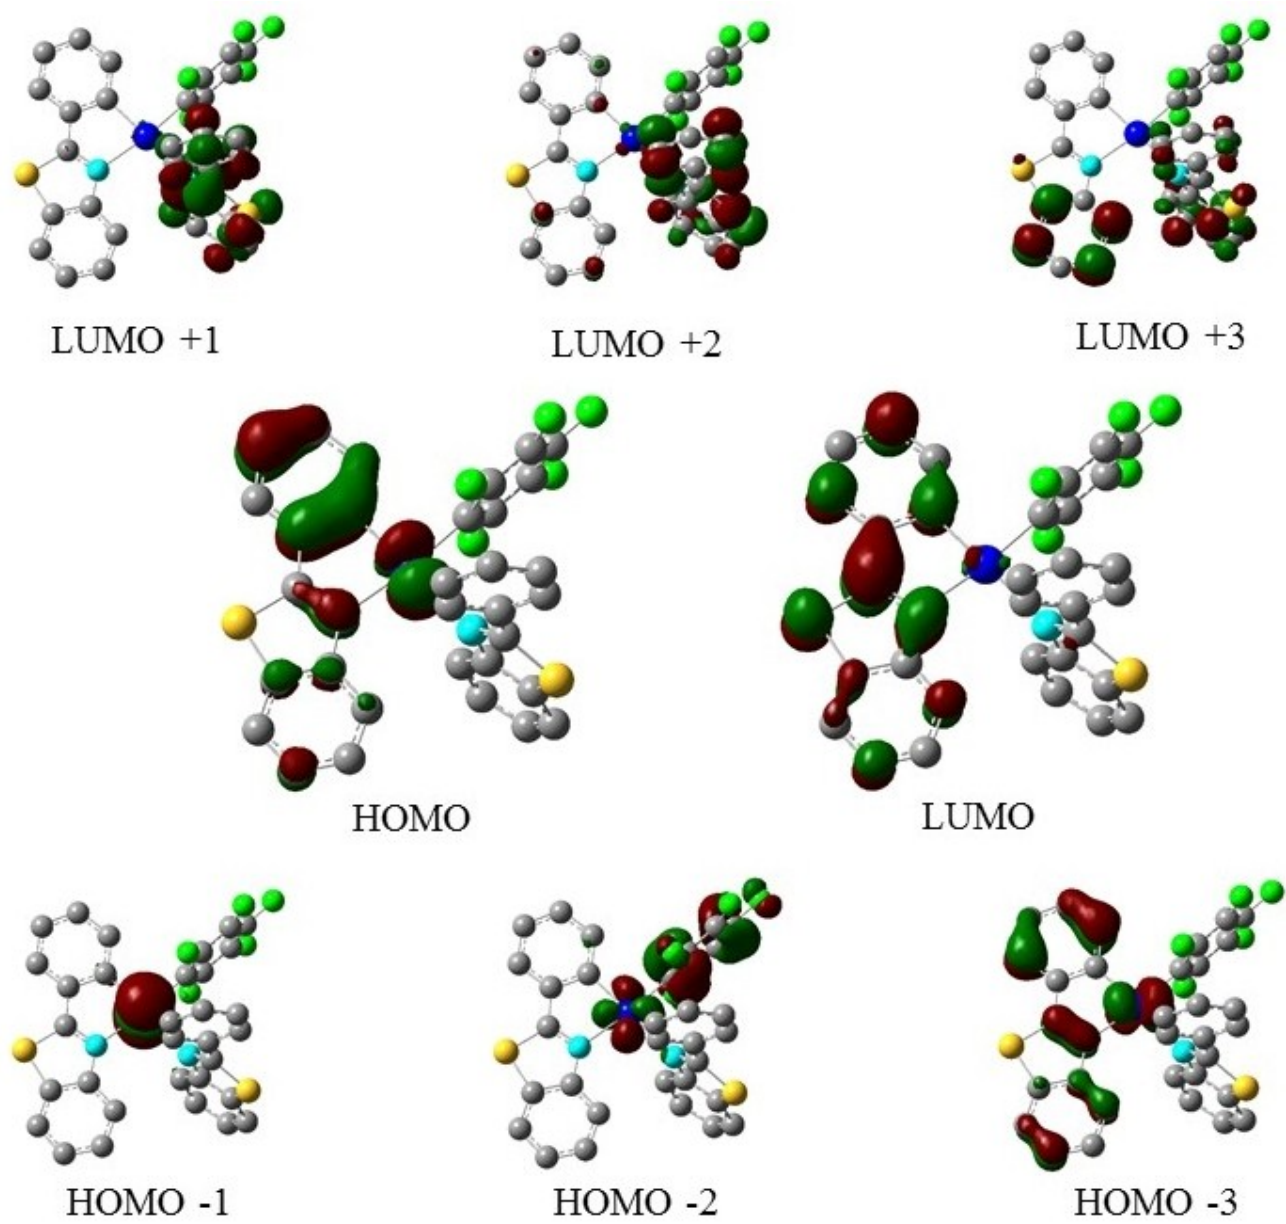

**Fig. S19** Selected frontier Molecular Orbitals for complex **2b**.

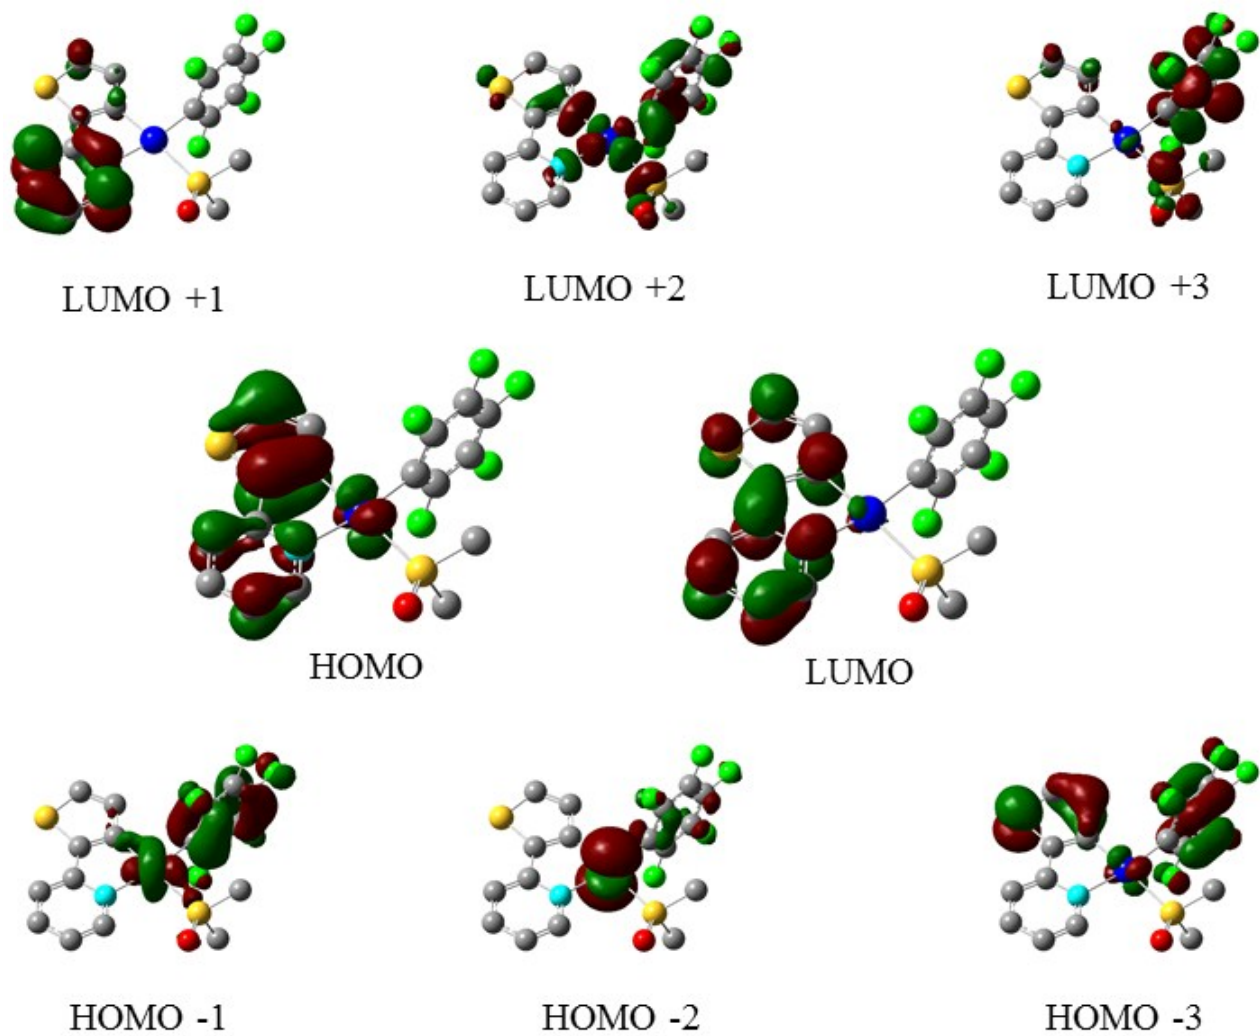

**Fig. S20** Selected frontier Molecular Orbitals for complex 3a.

**Table S3** Selected vertical excitation energies singlets ( $S_0$ ) and first triplets computed by TD-DFT/ SCRf ( $\text{CH}_2\text{Cl}_2$ ) with the orbitals involved for complexes for **1a**, **1c**, **2b** and **3a**.

|                 | State           | $\lambda_{\text{ex}}(\text{calc})(\text{nm})$ | $f^{\text{a}}$                   | Transition (% Contribution)                                      |
|-----------------|-----------------|-----------------------------------------------|----------------------------------|------------------------------------------------------------------|
| <b>1a</b>       | T <sub>1</sub>  | 435,93                                        | 0,0                              | H-6->LUMO (11%), H-2->LUMO (10%), HOMO->LUMO (27%)               |
|                 | T <sub>2</sub>  | 416,32                                        | 0,0                              | H-3->L+1 (21%), HOMO->L+1 (13%)                                  |
|                 | S <sub>1</sub>  | 374,76                                        | 0,0125                           | HOMO->LUMO (98%)                                                 |
|                 | S <sub>2</sub>  | 367,86                                        | 0,0005                           | HOMO->L+1 (98%)                                                  |
|                 | S <sub>3</sub>  | 339,32                                        | 0,0043                           | H-1->LUMO (97%)                                                  |
|                 | S <sub>4</sub>  | 332,56                                        | 0,0105                           | H-1->L+1 (96%)                                                   |
|                 | S <sub>5</sub>  | 322,96                                        | 0,0102                           | H-2->LUMO (92%)                                                  |
|                 | S <sub>6</sub>  | 318,87                                        | 0,0256                           | H-2->L+1 (74%), HOMO->L+2 (13%)                                  |
|                 | S <sub>7</sub>  | 316,95                                        | 0,0081                           | H-2->L+1 (15%), HOMO->L+2 (79%)                                  |
|                 | S <sub>8</sub>  | 313,46                                        | 0,0021                           | HOMO->L+3 (42%), HOMO->L+4 (41%)                                 |
|                 | S <sub>9</sub>  | 308,42                                        | 0,1169                           | H-4->LUMO (11%), H-3->LUMO (74%)                                 |
|                 | S <sub>10</sub> | 303,59                                        | 0,0496                           | H-4->L+1 (10%), H-3->L+1 (77%)                                   |
| S <sub>11</sub> | 300,08          | 0,0114                                        | HOMO->L+3 (49%), HOMO->L+4 (38%) |                                                                  |
| <b>1c</b>       | T <sub>1</sub>  | 462,69                                        | 0,0                              | H-6->L+1 (18%), H-4->LUMO (28%), H-2->L+1 (11%), H-1->LUMO (18%) |
|                 | T <sub>2</sub>  | 461,09                                        | 0,0                              | H-6->LUMO (20%), H-4->L+1 (25%), H-2->LUMO (16%), H-1->L+1 (16%) |
|                 | T <sub>3</sub>  | 405,36                                        | 0,0                              | HOMO->LUMO (94%)                                                 |
|                 | S <sub>1</sub>  | 400,50                                        | 0,0075                           | HOMO->LUMO (98%)                                                 |
|                 | S <sub>2</sub>  | 388,44                                        | 0,0006                           | HOMO->L+1 (99%)                                                  |
|                 | S <sub>3</sub>  | 365,57                                        | 0,0164                           | H-1->LUMO (95%)                                                  |
|                 | S <sub>4</sub>  | 354,44                                        | 0,0414                           | H-2->LUMO (21%), H-1->L+1 (74%)                                  |
|                 | S <sub>5</sub>  | 350,28                                        | 0,0035                           | H-2->LUMO (74%), H-1->L+1 (21%)                                  |
|                 | S <sub>6</sub>  | 342,58                                        | 0,003                            | H-2->L+1 (93%)                                                   |
|                 | S <sub>7</sub>  | 333,91                                        | 0,0563                           | H-4->LUMO (89%)                                                  |
|                 | S <sub>8</sub>  | 322,70                                        | 0,0096                           | H-4->L+1 (16%), H-3->LUMO (76%)                                  |
|                 | S <sub>9</sub>  | 321,28                                        | 0,0413                           | H-4->L+1 (73%), H-3->LUMO (13%)                                  |
|                 | S <sub>10</sub> | 318,04                                        | 0,0044                           | H-5->LUMO (47%), H-3->L+1 (50%)                                  |
|                 | S <sub>11</sub> | 311,25                                        | 0,0152                           | HOMO->L+4 (85%)                                                  |
| S <sub>12</sub> | 308,11          | 0,0058                                        | H-7->LUMO (17%), H-6->LUMO (72%) |                                                                  |
| S <sub>13</sub> | 306,96          | 0,0046                                        | H-5->LUMO (46%), H-3->L+1 (45%)  |                                                                  |
| <b>2b</b>       | T <sub>1</sub>  | 491,98                                        | 0,0                              | H-3->LUMO (11%), HOMO->LUMO (76%)                                |
|                 | T <sub>2</sub>  | 419,99                                        | 0,0                              | H-6->L+1 (50%), H-1->L+1 (14%)                                   |
|                 | S <sub>1</sub>  | 394,56                                        | 0,099                            | HOMO->LUMO (84%)                                                 |
|                 | S <sub>2</sub>  | 389,66                                        | 0,0208                           | H-1->LUMO (87%)                                                  |
|                 | S <sub>3</sub>  | 379,23                                        | 0,0077                           | H-1->L+1 (48%), HOMO->L+1 (45%)                                  |
|                 | S <sub>4</sub>  | 374,07                                        | 0,0031                           | H-1->L+1 (46%), HOMO->L+1 (50%)                                  |
|                 | S <sub>5</sub>  | 351,52                                        | 0,0061                           | H-2->LUMO (93%)                                                  |
|                 | S <sub>6</sub>  | 347,42                                        | 0,0161                           | H-2->L+1 (94%)                                                   |
|                 | S <sub>7</sub>  | 330,68                                        | 0,1064                           | H-3->LUMO (78%)                                                  |
| S <sub>8</sub>  | 327,82          | 0,0124                                        | H-3->L+1 (83%)                   |                                                                  |

|                |                 |         |                                                    |                                                      |
|----------------|-----------------|---------|----------------------------------------------------|------------------------------------------------------|
|                | S <sub>9</sub>  | 316,70  | 0,002                                              | H-4->L+1 (91%)                                       |
|                | S <sub>10</sub> | 312,08  | 0,0185                                             | H-4->LUMO (86%)                                      |
|                | S <sub>11</sub> | 309,79  | 0,317                                              | H-5->LUMO (76%)                                      |
|                | S <sub>12</sub> | 302,74  | 0,0264                                             | H-5->L+1 (85%)                                       |
| <b>3a</b>      | T <sub>1</sub>  | 527,81  | 0,0                                                | HOMO->LUMO (90%)                                     |
|                | T <sub>2</sub>  | 361,53  | 0,0                                                | H-3->LUMO (17%), HOMO->L+1 (60%)                     |
|                | S <sub>1</sub>  | 374,06  | 0,1164                                             | HOMO->LUMO (94%)                                     |
|                | S <sub>2</sub>  | 337,60  | 0,0081                                             | H-2->LUMO (11%), H-1->LUMO (89%)                     |
|                | S <sub>3</sub>  | 314,37  | 0,0052                                             | H-2->LUMO (84%), H-1->LUMO (10%)                     |
|                | S <sub>4</sub>  | 304,447 | 0,0503                                             | H-5->LUMO (21%), H-3->LUMO (21%),<br>HOMO->L+1 (51%) |
|                | S <sub>5</sub>  | 298,407 | 0,1355                                             | H-5->LUMO (14%), H-3->LUMO (69%),<br>HOMO->L+1 (11%) |
|                | S <sub>6</sub>  | 295,56  | 0,0014                                             | HOMO->L+2 (89%)                                      |
|                | S <sub>7</sub>  | 290,13  | 0,0043                                             | H-4->LUMO (94%)                                      |
|                | S <sub>8</sub>  | 285,92  | 0,1805                                             | H-5->LUMO (38%), H-1->L+2 (20%),<br>HOMO->L+1 (27%)  |
| S <sub>9</sub> | 282,45          | 0,1241  | H-5->LUMO (22%), H-2->L+2 (11%),<br>H-1->L+2 (55%) |                                                      |

a) Oscillator Strength



**Table S4** Composition (%) of frontier molecular orbitals in the first triple-state for **1a**, **1c**, **2b** and **3a** in CH<sub>2</sub>Cl<sub>2</sub>

| <b>1a</b> |       |                                   |                                   |          |          |    |
|-----------|-------|-----------------------------------|-----------------------------------|----------|----------|----|
|           | eV    | C <sub>6</sub> F <sub>5</sub> (1) | C <sub>6</sub> F <sub>5</sub> (2) | Hthpy(1) | Hthpy(2) | Pt |
| SOMO      | -3.83 | 0                                 | 0                                 | 1        | 98       | 1  |
| SOMO-1    | -5.99 | 4                                 | 5                                 | 14       | 4        | 74 |
| <b>1c</b> |       |                                   |                                   |          |          |    |
|           | eV    | C <sub>6</sub> F <sub>5</sub> (1) | C <sub>6</sub> F <sub>5</sub> (2) | Hpq(1)   | Hpq(2)   | Pt |
| SOMO      | -3.84 | 0                                 | 0                                 | 0        | 98       | 1  |
| SOMO-1    | -6.02 | 8                                 | 5                                 | 5        | 7        | 74 |
| <b>2b</b> |       |                                   |                                   |          |          |    |
|           | eV    | C <sub>6</sub> F <sub>5</sub>     | Hbt                               | bt       | Pt       |    |
| SOMO      | -3.64 | 0                                 | 0                                 | 95       | 5        |    |
| SOMO-1    | -6.07 | 1                                 | 1                                 | 75       | 23       |    |
| <b>3a</b> |       |                                   |                                   |          |          |    |
|           | eV    | C <sub>6</sub> F <sub>5</sub>     | thpy                              | dmso     | Pt       |    |
| SOMO      | -3.61 | 0                                 | 92                                | 1        | 6        |    |
| SOMO-1    | -6.24 | 0                                 | 78                                | 1        | 20       |    |

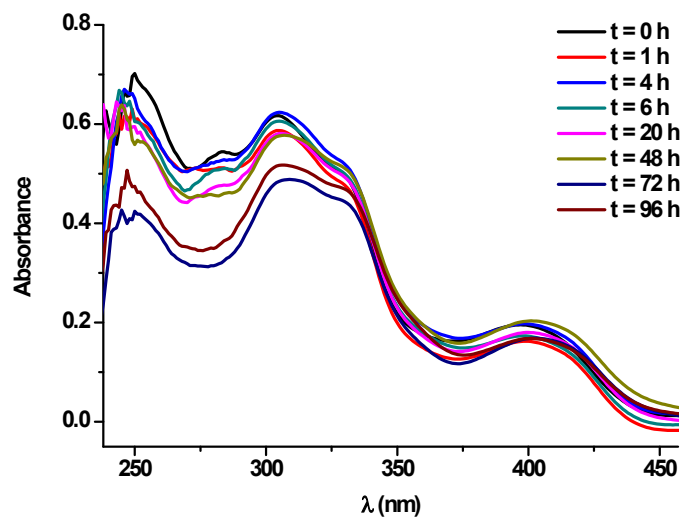

a)

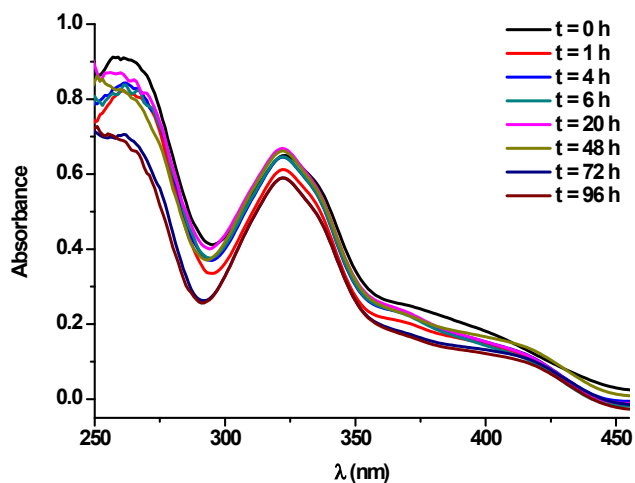

b)

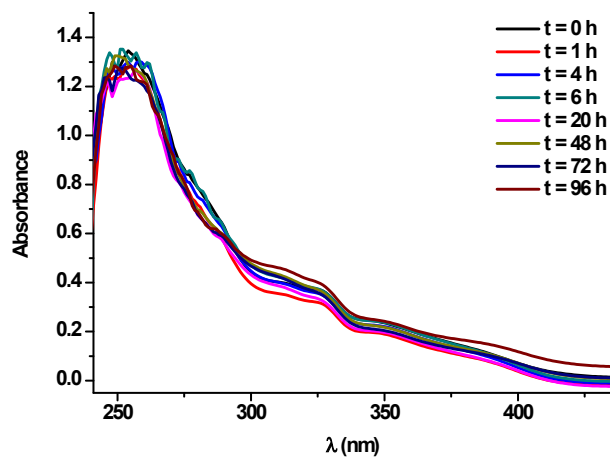

c)

**Fig. S21** UV-vis absorption spectra of a) **3a**, b) **3b** and c) **4**, ( $5 \times 10^{-5}$ M) recorded in DMSO (<1%)-cellular medium (see text) after been kept at room temperature since 0 h to 96 h (intervals in legends)

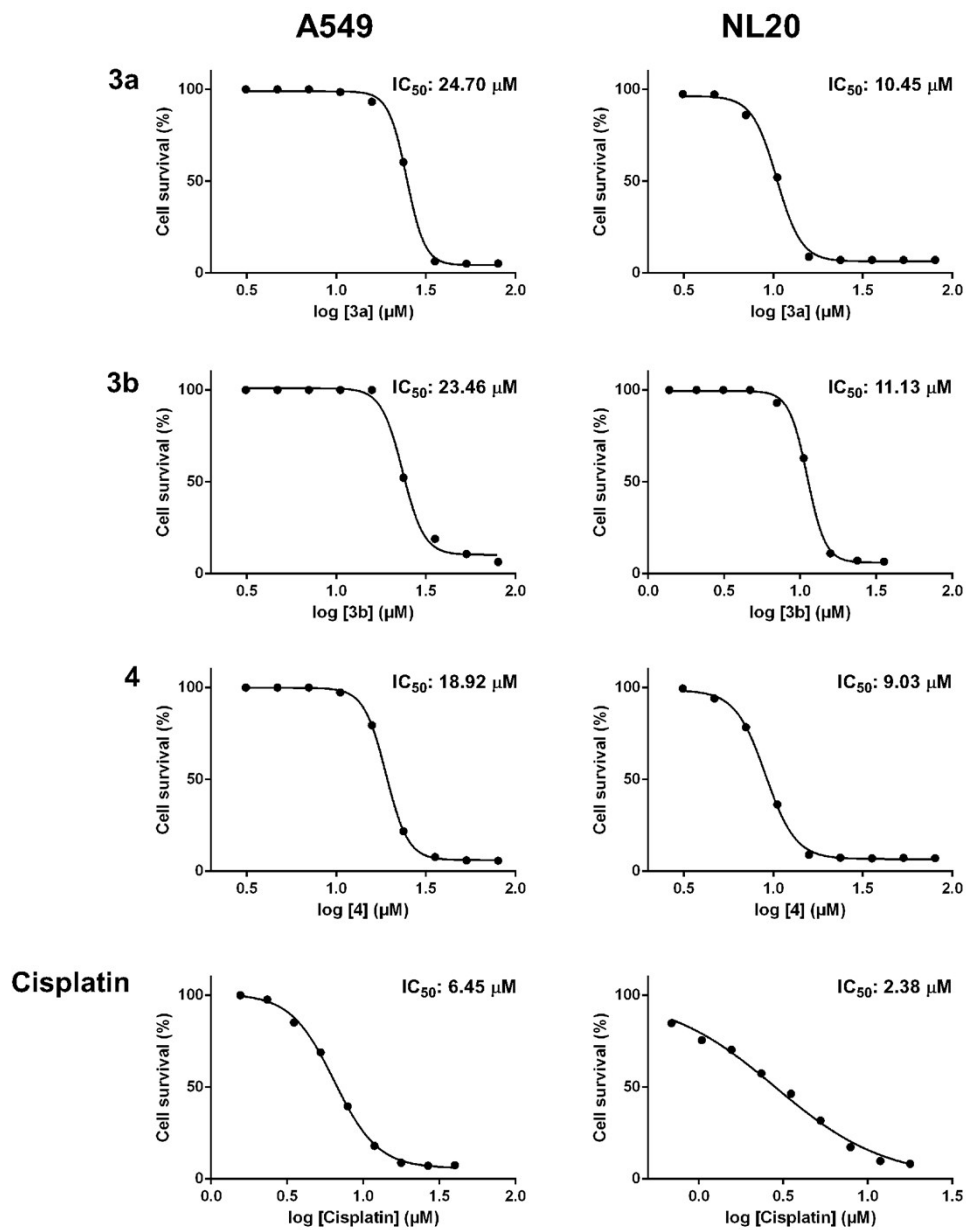

**Fig. S22** Dose-response curves for determination of the  $IC_{50}$  cytotoxicity values of **3a**, **3b** and **4**, and their comparison with cisplatin, in A549 and NL20 cell lines. The  $IC_{50}$  values correspond to the dose required to inhibit 50% cellular growth, determined from the dose-dependence of surviving cells after cellular exposure to compounds for 72 h.

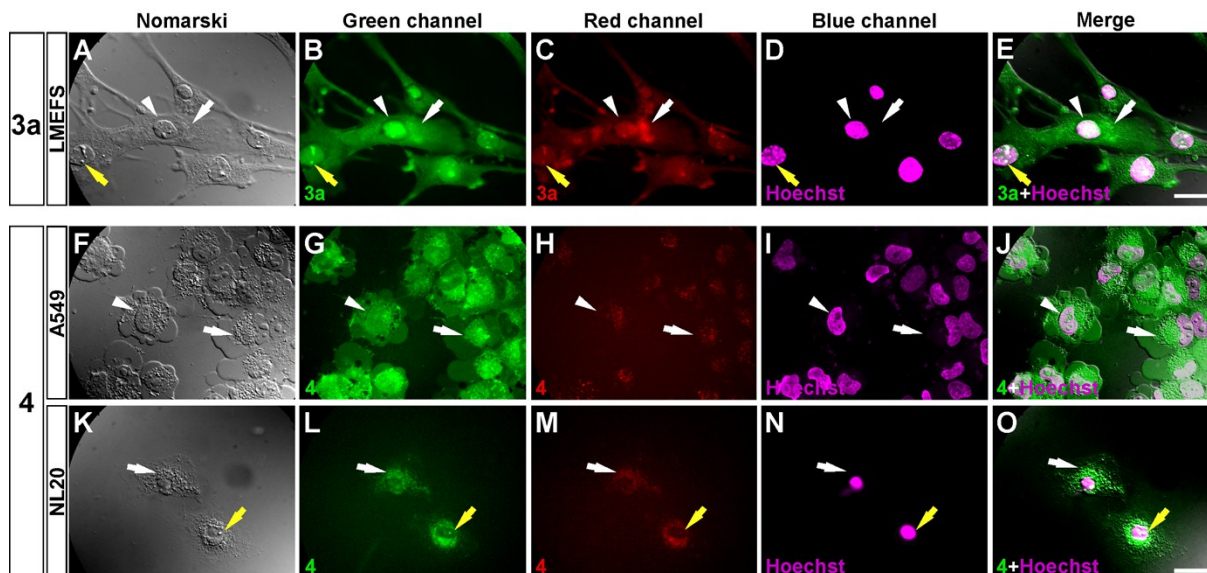

**Fig. S23** Fluorescence images of mouse lung embryonic fibroblasts (LMEFs) treated with **3a**, and A549 and NL20 cells treated with complex **4**. Living LMEFs were treated with complex **3a** (A-E), and A549 and NL20 cells were treated with complex **4** (F-O) (both 40  $\mu$ M), in combination with the DNA binder Hoechst 33258 (3.2  $\mu$ M) for 30 min. Cells were visualized by microscopy either for Nomarski white-light transmission (A, E and K), or for fluorescence emission in green (B, G and L), red (C, H and M) and blue (D, I and N). Overlay of Nomarski, green, red and blue images are shown in right panels (E, J and O) (merged). Note that in LMEFs **3a** stains the cytoplasm, stronger in perinuclear areas (white arrows), nuclei (white arrowheads) and nucleoli (yellow arrows) in green, and in red with less intensity. Complex **4** stains the cytoplasm of A549 cells, stronger in the perinuclear structures (white arrows), and most nuclei (white arrowheads) including nucleoli, both in green, and in red (with less intensity). In NL20 cells, complex **4** stains the perinuclear cytoplasm (white arrows) and nucleoli (yellow arrows) in green, and in red with less intensity. Scales bar in E and O: 30  $\mu$ m.

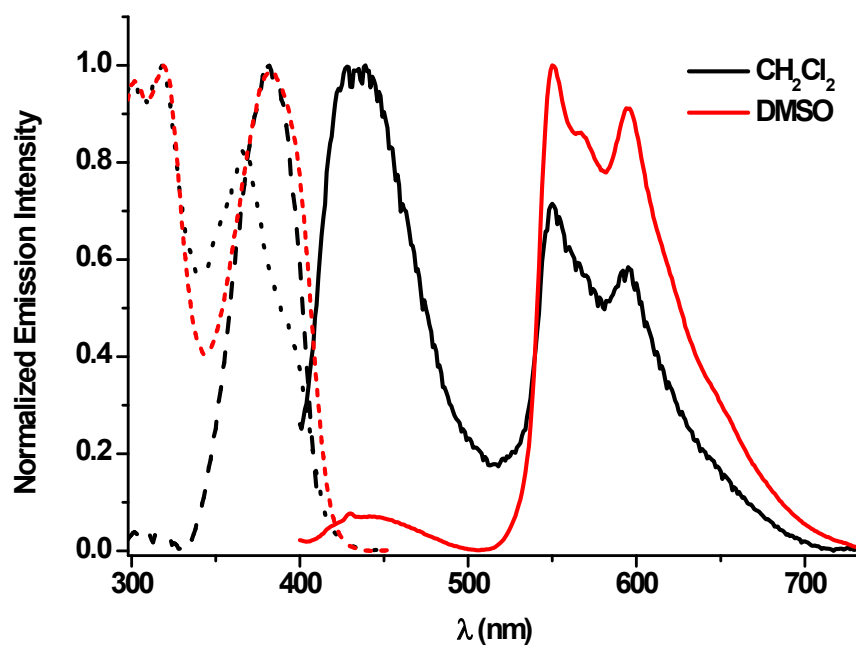

**Fig. S24** Comparative normalized excitation and emission spectra of **3a** in  $\text{CH}_2\text{Cl}_2$  and DMSO ( $5 \times 10^{-5}$  M) at 298 K

**Table S5 X-ray Crystallographic Data for 1a, 1c.0.75CH<sub>2</sub>Cl<sub>2</sub>, 2b, 3a and 3b**

|                                                  | <b>1a</b>                    | <b>1c.0.75CH<sub>2</sub>Cl<sub>2</sub></b> | <b>2b</b>                    | <b>3a</b>                    | <b>3b</b>                    |
|--------------------------------------------------|------------------------------|--------------------------------------------|------------------------------|------------------------------|------------------------------|
| Empirical formula                                | C30 H14 F10 N2<br>Pt S2      | C42 H22 F10 N2<br>Pt                       | C32 H17 F5 N2<br>Pt S2       | C17 H12 F5 N<br>O Pt S2      | C21 H14 F5 N<br>O Pt S2      |
| $F_w$                                            | 851.64                       | 939.70                                     | 783.68                       | 600.49                       | 650.54                       |
| T (K)                                            | 120(1)                       | 173(1)                                     | 173(1)                       | 173(1)                       | 173 (1)                      |
| crystal system, space group                      | Orthorhombic,<br>P bca       | Monoclinic, P 21/n                         | Monoclinic,<br>P 21/a        | Triclinic, P -1              | Triclinic, P -1              |
| a(Å)                                             | 12.6350(2)                   | 8.2453(2)                                  | 14.9033(5)                   | 6.7971(2)                    | 7.5475(2)                    |
| b(Å)                                             | 18.4730(3)                   | 26.5307(7)                                 | 12.3384(4)                   | 10.3253(5)                   | 11.4335(5)                   |
| c(Å)                                             | 23.9410(3)                   | 16.6300(4)                                 | 15.0986(4)                   | 12.4185(6)                   | 11.8516(5)                   |
| $\alpha$ (deg)                                   | 90                           | 90                                         | 90.                          | 84.911(2)                    | 99.861(2)                    |
| $\beta$ (deg)                                    | 90                           | 94.703(2)                                  | 105.414(2)                   | 85.894(3)                    | 98.362(2)                    |
| $\gamma$ (deg)                                   | 90                           | 90                                         | 90.                          | 88.980(3)                    | 91.328(3)                    |
| volume (Å <sup>3</sup> )                         | 5587.98(14)                  | 3625.62(16)                                | 1129.94(9)                   | 865.84(6)                    | 995.69(7)                    |
| Z                                                | 8                            | 4                                          | 4                            | 2                            | 2                            |
| $D_{\text{calcd}}$ (Mg/m <sup>3</sup> )          | 2.025 Mg/m <sup>3</sup>      | 1.722                                      | 1.945                        | 2.303                        | 2.170                        |
| absorption coefficient (mm <sup>-1</sup> )       | 5.264                        | 3.955                                      | 5.461                        | 8.403                        | 7.316                        |
| F(000)                                           | 3264                         | 1824                                       | 1512                         | 568                          | 620                          |
| $\theta$ range for data collection (deg)         | 3.37 to 25.68                | 1.449 to 25.026                            | 3.258 to 27.476              | 1.650 to 24.711              | 3.470 to 24.707              |
| no of data / restraints / params                 | 5299 / 0 / 358               | 6376 / 0 / 496                             | 6068 / 0 / 379               | 2795 / 0 / 215               | 3284 / 0 / 280               |
| goodness-of-fit on $F^2$ <sup>[a]</sup>          | 1.037                        | 1.128                                      | 1.096                        | 1.197                        | 0.938                        |
| final R indices [ $>2\sigma(I)$ ] <sup>[a]</sup> | R1 = 0.0260,<br>wR2 = 0.0543 | R1 = 0.0445,<br>wR2 = 0.1169               | R1 = 0.0262,<br>wR2 = 0.0551 | R1 = 0.0547,<br>wR2 = 0.1467 | R1 = 0.0345,<br>wR2 = 0.0932 |
| R indices (all data) <sup>[a]</sup>              | R1 = 0.0340,<br>wR2 = 0.0583 | R1 = 0.0551, wR2 = 0.1250                  | R1 = 0.0317, wR2 = 0.0571    | R1 = 0.0556,<br>wR2 = 0.1501 | R1 = 0.0349,<br>wR2 = 0.0939 |
| largest diff peak and hole (e.Å <sup>-3</sup> )  | 2.328 and -1.255             | 2.131 and -2.136                           | 1.417 and -0.779             | 2.834 and -<br>3.185         | 1.768 and -<br>2.827         |

<sup>[a]</sup>  $R1 = \Sigma(|F_o| - |F_c|) / \Sigma|F_o|$ ;  $wR2 = [\Sigma w(F_o^2 - F_c^2)^2 / \Sigma w F_o^2]^{1/2}$ ; goodness of fit =  $\{\Sigma[w(F_o^2 - F_c^2)^2] / (N_{\text{obs}} - N_{\text{param}})\}^{1/2}$ ;  $w = [\sigma^2(F_o) + (g_1 P)^2 + g_2 P]^{-1}$ ;  $P = [\max(F_o^2; 0 + 2F_c^2)]/3$ .

Complete reference 39:

Gaussian 09, Revision B.01, M. J. Frisch, G. W. Trucks, H. B. Schlegel, G. E. Scuseria, M. A. Robb, J. R. Cheeseman, G. Scalmani, V. Barone, B. Mennucci, G. A. Petersson, H. Nakatsuji, M. Caricato, X. Li, H. P. Hratchian, A. F. Izmaylov, J. Bloino, G. Zheng, J. L. Sonnenberg, M. Hada, M. Ehara, K. Toyota, R. Fukuda, J. Hasegawa, M. Ishida, T. Nakajima, Y. Honda, O. Kitao, H. Nakai, T. Vreven, J. A. Montgomery, Jr., J. E. Peralta, F. Ogliaro, M. Bearpark, J. J. Heyd, E. Brothers, K. N. Kudin, V. N. Staroverov, T. Keith, R. Kobayashi, J. Normand, K. Raghavachari, A. Rendell, J. C. Burant, S. S. Iyengar, J. Tomasi, M. Cossi, N. Rega, J. M. Millam, M. Klene, J. E. Knox, J. B. Cross, V. Bakken, C. Adamo, J. Jaramillo, R. Gomperts, R. E. Stratmann, O. Yazyev, A. J. Austin, R. Cammi, C. Pomelli, J. W. Ochterski, R. L. Martin, K. Morokuma, V. G. Zakrzewski, G. A. Voth, P. Salvador, J. J. Dannenberg, S. Dapprich, A. D. Daniels, O. Farkas, J. B. Foresman, J. V. Ortiz, J. Cioslowski, and D. J. Fox, Gaussian, Inc., Wallingford CT, 2010.
